# Supplementary material
Source: publisher figshare collection journal article supplement (https://geolsoc.figshare.com/ndownloader/files/34776301)
Supplement: Supplementary file 1 [file 34776301]

## Sheet: AL002
Thermomagnetic results
Sample	TEMP	TSUSC	TIME
AL002	(°C)	(°C)	(s)
	22.1	210.6	0
	22.3	210.6	17
	23.9	210.7	32
	25.9	210.6	47
	28.3	210.8	62
	30.6	210.8	77
	32.7	211	92
	34.7	211.1	108
	36.8	211.2	123
	38.9	211.2	138
	40.7	211.3	153
	42.5	211.4	168
	44.3	211.4	183
	46.1	211.6	198
	47.7	211.9	214
	49.2	211.9	229
	50.8	211.9	244
	52.4	211.9	259
	54.2	212.1	274
	55.7	212.2	289
	57.3	212.2	305
	58.9	212.3	320
	60.4	212.4	335
	62.2	212.4	350
	63.8	212.6	365
	65.4	212.7	380
	66.9	212.8	395
	68.5	212.9	410
	70.1	213	425
	71.6	213	440
	73.5	213.3	455
	75	213.3	471
	76.9	213.4	486
	78.7	213.7	501
	80.3	213.7	516
	82.1	214	531
	84	213.9	546
	85.8	214.1	561
	87.6	214.3	576
	89.5	214.3	591
	91.3	214.5	606
	93.2	214.3	621
	95	214.6	636
	96.8	214.6	651
	98.7	214.8	666
	100	215	681
	100.8	215.1	697
	101.1	215.3	712
	101.1	215.1	727
	101.3	215.4	742
	101.6	215.5	757
	101.8	215.9	772
	102.9	215.8	787
	105.8	215.8	802
	109.8	216.2	817
	113.5	216.5	832
	116.7	216.7	847
	119.8	217.1	862
	122.8	217	877
	125.7	217	892
	128.3	217.4	908
	131	217.3	923
	133.7	217.5	938
	136.1	218	953
	138.7	217.7	968
	141.4	218.3	983
	143.8	218.2	998
	146.2	218.3	1013
	148.6	218.5	1028
	151	218.8	1043
	153.2	218.9	1059
	155.6	219	1074
	158	219.5	1089
	160.2	219.4	1104
	162.3	219.8	1119
	164.5	219.8	1134
	166.6	220.2	1149
	168.8	220.4	1164
	170.9	220.3	1179
	173.3	220.6	1194
	175.8	220.6	1209
	177.9	221	1224
	180.1	221.3	1239
	182.8	221.6	1254
	185	221.7	1269
	187.4	221.8	1284
	189.8	222.2	1300
	192.3	222.3	1315
	194.7	222.6	1330
	197.2	222.8	1345
	199.3	222.8	1360
	201.5	223.3	1375
	204	223.3	1390
	206.2	223.6	1405
	208.3	224	1420
	210.5	224.1	1435
	212.7	224.4	1450
	214.9	224.4	1465
	216.8	224.7	1480
	219.3	224.8	1495
	221.2	225.2	1510
	223.6	225.5	1525
	226.1	225.6	1540
	228.6	226	1556
	231.1	226.1	1571
	233.8	226.5	1585
	236.3	226.8	1601
	238.5	226.6	1616
	241.2	225.7	1633
	243.4	227.6	1648
	245.9	227.4	1663
	248.1	227.9	1678
	250.6	228.1	1693
	252.8	228.2	1708
	255.3	228.4	1723
	257.8	228.9	1738
	260.3	228.9	1753
	262.8	229.3	1768
	265	229.3	1783
	267.5	229.5	1798
	270	229.8	1813
	272.3	229.9	1828
	275	230.1	1843
	277.6	230.5	1858
	280.1	230.8	1873
	282.6	230.9	1888
	285.4	231.9	1906
	287.9	231.5	1921
	290.4	231.8	1936
	292.9	231.9	1951
	295.7	232.2	1966
	298.8	232	1983
	301.4	232.6	1998
	303.9	232.9	2013
	306.4	233	2028
	308.7	233.2	2043
	311.2	233.3	2059
	314	232.5	2076
	316.8	233.6	2093
	320	234.3	2110
	322.8	234.3	2127
	325.3	234.5	2142
	327.9	234.2	2159
	330.4	233.5	2175
	333	235.3	2192
	335.5	233.2	2209
	338.1	234.2	2225
	340.7	234.7	2241
	342.9	234.6	2256
	345.5	233.8	2272
	348.4	234.4	2289
	350.9	235.1	2306
	353.8	235.4	2323
	356.7	232.6	2340
	359.2	233.1	2355
	362.4	232.7	2370
	366.1	231.8	2388
	369.6	231.3	2403
	372.7	230.4	2419
	375.6	229.8	2434
	379.1	228.6	2449
	382.2	227.1	2464
	385.1	226.4	2480
	388.3	224.2	2497
	390.9	223.6	2513
	393.5	222.2	2528
	395.8	220.9	2543
	398.4	219.1	2558
	401.1	217.9	2574
	404	216.3	2589
	406.6	214.8	2604
	409.5	213	2619
	412.4	211.2	2635
	414.7	209.4	2650
	417.1	207.8	2665
	419.7	206	2680
	422	204.3	2696
	424.4	202.5	2711
	427	200.9	2726
	430	199.5	2741
	432.6	197.8	2756
	435.2	195.6	2772
	437.9	194.4	2787
	440.5	192.8	2802
	443.5	190.9	2818
	446.1	189.5	2833
	449.1	187.8	2848
	452	186.4	2864
	455	185.1	2879
	458.2	183.6	2894
	461.2	182.4	2909
	464.2	181.1	2925
	467.4	179.5	2940
	469.8	178.3	2955
	472.5	177.2	2970
	475.2	176.3	2986
	477.9	175.2	3001
	480.5	174.2	3017
	483.8	173.4	3032
	487.1	172.7	3047
	490.1	171.9	3062
	493.1	171.3	3078
	495.8	170.7	3093
	497.9	170.1	3108
	500	169.4	3124
	501.8	169.1	3139
	503.9	168.5	3154
	505.7	168.4	3170
	507.8	168	3185
	509.9	167.9	3200
	512.4	167.2	3216
	515.1	167.2	3231
	518.1	167.1	3246
	520.8	166.6	3262
	523.2	166.4	3277
	525.7	166.6	3292
	528.1	166.3	3308
	530.8	166.4	3323
	533.9	166.5	3338
	536.6	166.2	3354
	539.7	166.2	3369
	542.7	166.7	3384
	546.1	166.3	3399
	548.8	166.5	3415
	551.6	166.6	3430
	554.3	166.7	3445
	557.1	166.7	3461
	560.1	166.2	3476
	563.2	163.4	3491
	566.6	159.8	3507
	569.7	154.6	3522
	572.8	145.3	3537
	575.8	132.7	3553
	578.9	121.3	3568
	581.4	110.5	3583
	584.5	99.2	3599
	587.3	86	3614
	590.1	73.8	3630
	592.9	61.5	3645
	595.4	50.2	3660
	598.2	41.1	3675
	600.6	31.2	3691
	603.1	23.1	3706
	605.9	16.5	3722
	609.1	12.6	3737
	611.6	10.1	3753
	614.4	8.7	3768
	617.5	7.6	3783
	621	6.3	3799
	623.8	5.7	3814
	627.2	4.8	3829
	630.7	3.9	3845
	634.2	3.2	3860
	637	2.8	3875
	640.2	1.8	3891
	643	0.9	3907
	645.9	0.6	3922
	649	-0.2	3938
	652.5	-0.9	3953
	655.7	-1.1	3968
	658.9	-2.2	3984
	662.1	-2.2	3999
	665.6	-2.9	4015
	668.8	-3.2	4030
	671.9	-4.2	4045
	675.5	-4	4060
	678.7	-4.6	4076
	682.2	-4.8	4091
	685.4	-5.6	4107
	688.6	-5.8	4122
	691.5	-6.2	4138
	694.4	-6.5	4153
	697.6	-7	4169
	700.9	-7.3	4184
	703.8	-7.9	4200
	705.7	-7.8	4215
	706.7	-7.7	4231
	707.3	-7.7	4246
	707.3	-7.9	4262
	707	-8	4277
	705.4	-7.8	4293
	703.8	-7.9	4308
	702.5	-7.7	4323
	700.5	-7.2	4339
	698.3	-7.2	4354
	696	-7	4370
	693.4	-6.8	4385
	691.2	-6.3	4401
	688.9	-6.5	4416
	686.7	-5.9	4431
	684.1	-5.4	4447
	681.9	-4.9	4462
	679.6	-4.7	4478
	677.7	-3.8	4494
	675.5	-4.7	4509
	672.9	-4.3	4525
	670.3	-4	4540
	668.1	-4	4556
	665.6	-3.1	4571
	663	-3.2	4586
	660.8	-2.6	4602
	658.2	-2.5	4617
	655.7	-1.8	4633
	653.2	-1.5	4648
	650.3	-1.4	4664
	647.8	-1	4679
	645.2	-0.9	4694
	642.4	-0.3	4710
	639.9	0	4725
	637	-0.1	4741
	634.2	0.2	4756
	632	0.2	4772
	629.4	0.2	4787
	627.2	0.3	4802
	624.7	0.5	4818
	622.8	0.8	4833
	620.6	1.3	4849
	617.8	1.6	4864
	615.6	2.1	4879
	613.1	2.7	4895
	610.9	4.5	4910
	608.4	7.7	4926
	605.9	12.3	4941
	603.1	19.8	4956
	600.3	29.3	4972
	597.5	40.1	4987
	595	51.3	5003
	592.6	63	5018
	590.1	75.4	5034
	587.3	88.1	5049
	584.8	102.8	5065
	582	117	5080
	579.2	130.1	5095
	576.8	140.9	5111
	574	151.1	5126
	571.2	159.9	5141
	568.8	165.5	5157
	566	167.2	5172
	563.5	167	5188
	561.1	165.5	5203
	558.6	163.6	5218
	555.8	161.3	5234
	553.4	159	5249
	550.6	156.4	5264
	548.2	153.8	5280
	545.8	151.2	5295
	543	149.2	5311
	540.6	148.9	5326
	538.4	148.3	5341
	536	147.7	5357
	533.9	147.2	5372
	531.4	147	5387
	529	146.3	5403
	526.3	146.2	5418
	523.5	145.8	5434
	520.8	145.4	5449
	518.1	145.1	5464
	515.4	144.9	5480
	513	144.5	5495
	510.2	144.4	5511
	507.8	144.2	5526
	505.1	144.1	5541
	502.7	143.8	5557
	500.3	143.7	5572
	498.5	143.4	5588
	496.1	143	5603
	494	143.2	5618
	491.9	142.9	5634
	489.5	142.9	5649
	486.8	142.6	5664
	484.1	142.6	5680
	481.7	142.6	5695
	479.4	142.4	5711
	477.3	142.3	5726
	475.8	142.2	5741
	474.3	142	5757
	472.5	141.7	5772
	470.7	141.6	5787
	468.6	141.6	5803
	466.3	141.6	5818
	463.9	141.3	5834
	461.8	141.3	5849
	459.7	141	5864
	458	141.2	5880
	455.9	140.9	5895
	454.4	140.8	5910
	452.6	140.5	5926
	451.1	140.5	5941
	450	140.6	5956
	448.8	140.4	5972
	447.3	140.4	5987
	445.2	140.5	6003
	443.5	140.2	6018
	442	140.4	6034
	440.2	140.3	6049
	438.8	139.8	6064
	437.6	139.9	6080
	436.1	140	6095
	434.6	139.8	6110
	433.2	139.8	6126
	431.7	139.7	6141
	430.5	139.9	6156
	429.1	139.5	6172
	427.6	139.4	6187
	426.1	139.7	6202
	424.7	139.5	6218
	423.5	139.4	6233
	422.3	139.2	6248
	421.5	139.1	6264
	420.3	139.1	6279
	419.1	139.3	6294
	417.7	138.9	6310
	416.2	139	6325
	415	139	6341
	414.2	138.7	6356
	413	138.9	6371
	411.8	138.8	6387
	410.7	138.7	6402
	409.5	138.6	6417
	408.3	138.3	6433
	407.5	138.6	6448
	406.6	138.5	6463
	405.4	138.5	6479
	404.3	138.2	6494
	402.5	138.4	6509
	401.1	138.1	6525
	399.6	138.2	6540
	398.4	138.2	6555
	397.3	138.3	6571
	396.4	138	6586
	395.3	138.2	6601
	394.1	138.1	6617
	392.9	137.9	6632
	391.5	138.1	6647
	390.3	138.2	6663
	388.6	137.8	6678
	386.9	137.9	6693
	385.1	137.7	6709
	383.7	137.4	6724
	382.2	137.6	6739
	380.5	137.3	6755
	378.8	137.4	6770
	377	137.4	6785
	375.3	137.6	6800
	373.6	137.3	6816
	372.1	137.3	6831
	371	137.1	6846
	369.8	137	6862
	368.7	137	6877
	367	136.8	6892
	365.3	136.7	6908
	363.2	136.7	6923
	361.2	136.6	6938
	359.2	136.6	6954
	357.5	136.7	6969
	355.5	136.4	6984
	353.8	136.5	6999
	352.1	136.2	7015
	350.6	136.3	7030
	349.2	136.3	7045
	347.5	136	7061
	345.8	136	7076
	344.4	135.9	7091
	342.7	135.7	7106
	341	135.8	7122
	339.5	135.7	7137
	337.5	135.7	7152
	335.8	135.4	7168
	334.4	135.4	7183
	333	135.1	7198
	331.6	135.5	7214
	329.9	135.2	7229
	328.7	134.9	7244
	327.3	135.2	7260
	326.2	135.3	7275
	324.8	135.2	7290
	323.6	135	7305
	322.2	135	7321
	321.1	134.8	7336
	320	135	7351
	318.8	135.1	7366
	317.7	134.8	7382
	316.3	134.9	7397
	314.9	134.5	7412
	313.7	134.5	7427
	312.6	134.2	7443
	311.2	134.2	7458
	310.1	134.3	7473
	309	134.3	7488
	307.8	134	7504
	306.7	134.2	7519
	305.6	134.1	7534
	303.9	134.1	7549
	302.2	133.8	7565
	300.5	134	7580
	298.5	133.9	7595
	296.6	133.7	7611
	294.6	133.2	7626
	292.7	133.4	7641
	290.4	133.3	7657
	288.5	133.5	7672
	286.5	133.2	7687
	284.5	133.2	7703
	282.6	132.8	7718
	280.6	132.9	7733
	278.7	132.7	7748
	276.7	132.6	7764
	274.5	132.6	7779
	272.5	132.2	7794
	270.9	132.5	7809
	268.9	132.4	7825
	267	132.3	7840
	265	132.1	7855
	263.1	132.2	7870
	260.9	131.8	7886
	258.7	131.9	7901
	256.4	131.7	7916
	254.2	131.6	7931
	252	131.5	7946
	250.3	131.2	7962
	248.4	131.2	7977
	246.8	131.3	7992
	244.8	131	8007
	242.9	131	8023
	241	131	8038
	238.8	130.8	8053
	236.8	130.7	8068
	234.6	130.5	8084
	232.4	130.3	8099
	230.2	130.2	8114
	227.8	130	8129
	225.3	130	8145
	222.8	129.9	8160
	220.4	129.7	8175
	217.9	129.5	8190
	215.4	129.4	8206
	212.7	129.4	8221
	210.2	129.5	8236
	207.8	129.2	8251
	205.1	129	8267
	202.6	128.9	8282
	200.2	128.8	8297
	198	128.5	8312
	195.5	128.5	8327
	193.4	128.6	8342
	190.9	128.5	8358
	188.8	128.2	8373
	186.6	128.2	8388
	184.4	128.1	8403
	182.3	128	8418
	179.8	127.9	8433
	177.7	127.8	8449
	175.2	127.8	8464
	172.5	127.6	8479
	170.1	127.7	8494
	167.7	127.5	8509
	165.3	127.4	8524
	162.8	127.4	8540
	160.4	127.2	8555
	158.3	127.2	8570
	156.1	127.3	8585
	154	127.3	8600
	151.8	127.2	8615
	149.7	127.1	8631
	147.6	127.1	8646
	145.4	127.1	8661
	143	127.2	8676
	140.9	127.1	8691
	138.5	127.1	8706
	136.3	126.9	8721
	134.2	127	8736
	132.1	127	8751
	129.7	127.1	8766
	127.3	126.9	8782
	124.9	126.9	8797

## Sheet: AL009
Thermomagnetic results
Sample	TEMP	TSUSC	TIME
AL009	(°C)	(°C)	(s)
	22.6	49.8	0
	22.6	51.8	17
	23.9	51.9	32
	25.7	51.8	47
	27.7	51.9	62
	29.8	52	77
	31.9	51.9	92
	33.9	52.1	107
	36	52.2	122
	38.1	52.2	137
	39.9	52.4	152
	41.7	52.4	168
	43.5	52.3	183
	45.3	52.5	198
	47.2	52.6	213
	49	52.8	228
	50.5	52.6	243
	52.4	52.7	258
	53.9	52.7	273
	55.7	52.9	288
	57.6	53.1	304
	59.4	53	319
	60.9	53.2	334
	62.8	53.3	349
	64.6	53.4	364
	66.4	53.4	380
	68	53.5	395
	69.8	53.6	410
	71.4	53.6	425
	73.2	53.7	440
	75	53.7	455
	76.9	53.8	470
	79	54	485
	80.8	54.1	501
	82.6	54.2	516
	84.5	54.2	531
	86.3	54.4	546
	88.4	54.4	561
	90.3	54.5	576
	92.1	54.6	591
	94.2	54.6	607
	96.3	54.7	622
	98.4	54.7	637
	100.8	55	652
	102.9	55.3	667
	105	55.4	682
	107.1	55.4	697
	109.5	55.3	712
	111.9	55.6	728
	114.3	55.8	743
	116.4	56	758
	118.5	56.2	773
	120.6	56.5	788
	122.8	56.2	804
	124.9	56.4	819
	126.7	57.1	834
	128.9	56.7	849
	131	57	864
	132.9	57.1	879
	134.7	57.3	895
	136.9	57.6	910
	138.7	57.7	925
	140.9	57.8	940
	143	58.1	955
	145.1	58.4	971
	147.3	58.6	986
	149.4	58.7	1001
	151.8	58.9	1016
	154	59.1	1031
	156.1	59.4	1047
	158.5	59.6	1062
	161	59.7	1077
	163.4	60.1	1092
	165.8	60.4	1107
	168.2	60.5	1122
	170.4	60.7	1138
	172.5	60.9	1153
	175	61.1	1168
	177.4	61.3	1183
	179.8	61.4	1198
	182.3	61.8	1214
	184.7	62.2	1229
	187.1	62.3	1244
	189.6	62.7	1259
	192	62.9	1274
	194.2	63.1	1290
	196.4	63.4	1305
	198.8	63.6	1320
	201.3	64	1335
	203.7	64.2	1350
	205.9	64.6	1366
	208.3	64.8	1381
	210.8	65	1396
	213.3	65.4	1411
	215.4	65.7	1426
	217.9	65.7	1442
	220.1	66	1457
	222.3	66.1	1472
	224.5	66.5	1487
	226.7	66.7	1502
	229.1	67	1517
	231.9	67.3	1533
	234.4	67.5	1548
	236.8	67.8	1563
	239.6	67.8	1578
	242.3	68.3	1593
	244.8	68.4	1609
	247.6	68.7	1624
	250.1	69.2	1639
	252.6	69.3	1655
	255.1	69.4	1670
	257.5	69.6	1685
	260	69.8	1700
	262.3	70.2	1715
	264.8	70.3	1731
	267.3	70.3	1746
	269.8	70.7	1761
	272.3	70.6	1776
	274.5	71	1792
	276.7	70.8	1807
	279.5	70.9	1822
	282	71.1	1837
	284.3	70.9	1852
	286.8	71.1	1868
	289.3	71.2	1883
	291.8	71.3	1898
	294.1	71.2	1913
	296.6	71.4	1929
	298.8	71.1	1944
	301.1	71.2	1959
	303.6	71	1974
	306.4	70.8	1990
	309.2	70.7	2005
	311.8	70.7	2020
	314	70.7	2035
	316.6	70.5	2050
	318.5	70.3	2066
	320.8	70	2081
	323.1	69.9	2096
	325.6	69.7	2112
	327.9	69.3	2127
	330.2	69.1	2142
	332.4	68.5	2157
	334.7	68.3	2173
	337	67.7	2188
	339.2	67.7	2203
	341.2	67.1	2218
	343.2	66.5	2234
	344.9	66.2	2249
	347.2	65.6	2264
	349.2	65	2279
	351.5	64.1	2295
	353.8	63.7	2310
	356.4	63	2325
	358.7	62.2	2340
	360.9	61.7	2356
	363.5	61.1	2371
	366.1	60.3	2386
	368.7	59.7	2401
	371.3	58.9	2417
	373.9	57.9	2432
	376.5	57	2447
	379.1	56.3	2463
	381.7	55.4	2478
	384.5	54.9	2493
	387.1	53.9	2509
	389.7	53	2524
	392.4	52.5	2539
	395	51.6	2555
	397.9	51.2	2570
	400.8	50.3	2585
	403.1	49.9	2600
	405.7	49.1	2616
	408	48	2631
	410.9	47.6	2646
	413.6	47.1	2662
	415.9	46.6	2677
	418.5	46	2692
	421.2	45.4	2707
	423.8	44.9	2723
	426.7	44.3	2738
	429.4	43.8	2753
	432	43.3	2769
	434.6	42.8	2784
	437.3	42.2	2799
	440.2	41.7	2814
	442.9	41	2830
	445.5	40.6	2845
	448.5	40.2	2860
	451.4	39.6	2876
	454.4	38.9	2891
	457.1	38.7	2906
	459.7	38.1	2921
	462.4	37.2	2937
	465.4	36.6	2952
	468.3	36.3	2968
	471	35.8	2983
	473.7	35.2	2998
	476.1	34.6	3013
	478.8	34	3029
	481.1	33.7	3044
	484.1	33.1	3059
	487.1	32.3	3075
	489.8	31.8	3090
	492.5	31.6	3105
	495.5	31	3121
	498.2	30.4	3136
	501.2	29.6	3152
	503.9	29.1	3167
	506.6	28.7	3182
	509	28.4	3198
	511.8	27.4	3213
	514.5	27.3	3228
	517.2	26.7	3244
	520.2	26.1	3259
	522.9	25.5	3274
	526	25	3290
	529	24.5	3305
	532	23.9	3321
	534.8	23.4	3336
	537.8	22.9	3351
	540.6	22.1	3367
	543	21.5	3382
	545.4	21.1	3397
	548.2	20.4	3413
	551	20	3428
	553.4	19.4	3444
	556.2	18.9	3459
	558.9	18.2	3474
	562	17.6	3490
	565.1	17	3505
	568.4	16.1	3520
	571.5	15	3535
	574.3	12.6	3551
	577.4	8.4	3566
	580.2	3.2	3582
	583.3	-4.3	3597
	586	-14.3	3612
	589.5	-27.9	3628
	592.6	-43.7	3643
	595.4	-57.2	3658
	598.5	-70.3	3674
	601.3	-81.2	3689
	603.8	-88.9	3704
	606.6	-95.1	3720
	609.7	-99.6	3735
	613.1	-101.4	3750
	616.3	-102.8	3766
	619.7	-104	3781
	622.8	-104.9	3796
	626.3	-105.8	3812
	629.8	-106.6	3827
	632.9	-107.3	3843
	636.4	-108	3858
	639.5	-108.6	3874
	642.7	-109.1	3889
	646.2	-109.7	3904
	649.7	-110.3	3920
	653.2	-110.7	3935
	656.6	-111.2	3950
	660.5	-111.6	3966
	664	-112.1	3981
	667.2	-113	3997
	670.3	-113.2	4012
	673.5	-113.7	4027
	676.7	-114	4043
	679.9	-114.5	4058
	682.8	-114.7	4073
	686	-114.7	4089
	689.3	-115.2	4104
	692.5	-115.8	4120
	695.4	-116.1	4135
	698.6	-116.2	4150
	701.2	-116.6	4166
	703.1	-117	4181
	704.4	-117.1	4196
	704.8	-117	4212
	704.1	-117.2	4227
	703.1	-117.2	4242
	702.2	-117.2	4258
	700.5	-117.1	4273
	698.9	-117.2	4289
	697	-117	4304
	695.1	-116.6	4320
	693.1	-116.3	4335
	690.9	-116.5	4350
	688.6	-116.5	4366
	686.4	-116.1	4381
	683.8	-115.9	4397
	681.9	-116	4412
	679.6	-115.9	4427
	677.7	-115.3	4443
	675.5	-115.5	4458
	673.2	-115	4474
	671	-114.7	4489
	668.8	-114.6	4504
	666.2	-114.2	4520
	663.6	-114.3	4535
	661.1	-113.9	4551
	658.9	-113.5	4566
	656.3	-113.5	4581
	654.1	-113	4597
	651.9	-112.9	4612
	649.7	-112.5	4627
	647.1	-112.1	4643
	644.9	-112	4658
	642.4	-111.7	4673
	640.2	-111.3	4689
	637.6	-110.8	4704
	635.1	-110.6	4720
	632.6	-110.3	4735
	630.1	-110.2	4751
	627.6	-109.5	4766
	625	-109	4782
	622.5	-108.7	4797
	620.3	-108.4	4812
	618.1	-107.6	4828
	615.6	-107.1	4843
	612.8	-105.5	4859
	610.3	-103.6	4874
	607.5	-98.7	4890
	605	-92.9	4905
	602.2	-86.8	4920
	599.7	-79.4	4936
	597.2	-71.9	4951
	594.7	-63.7	4967
	592.2	-55.3	4982
	589.5	-45.9	4998
	587	-37.3	5013
	584.5	-29.8	5028
	581.7	-24.8	5044
	579.2	-20.8	5059
	576.8	-18	5074
	574.3	-15.4	5090
	571.8	-14.3	5105
	569.4	-13.7	5120
	566.9	-13.5	5136
	564.4	-13	5151
	562	-12.7	5167
	559.5	-12.9	5182
	557.1	-12.9	5197
	554.6	-12.7	5213
	552.5	-13	5228
	549.7	-12.8	5243
	547.3	-12.8	5259
	544.8	-12.8	5274
	542.4	-12.7	5290
	540	-12.7	5305
	537.5	-12.8	5320
	534.5	-12.8	5336
	531.7	-12.6	5351
	528.7	-12.8	5366
	525.7	-12.9	5382
	523.2	-12.8	5397
	520.5	-12.8	5413
	518.1	-12.7	5428
	515.7	-13	5444
	513	-12.8	5459
	510.6	-12.8	5474
	507.8	-12.8	5489
	505.4	-12.9	5505
	502.7	-13.1	5520
	500.3	-13.1	5536
	497.6	-12.8	5551
	495.2	-13	5566
	492.5	-12.8	5582
	490.1	-13.1	5597
	487.4	-13.2	5612
	485.3	-13.1	5628
	482.9	-13.1	5643
	481.1	-13	5658
	479.4	-13.1	5674
	477.6	-13	5689
	475.5	-13.2	5704
	473.4	-13.3	5720
	471.6	-13.3	5735
	469.8	-13.4	5751
	468	-13.4	5766
	466	-13.3	5781
	463.9	-13.4	5797
	461.8	-13.4	5812
	459.7	-13.4	5827
	458	-13.5	5843
	456.2	-13.4	5858
	454.7	-13.4	5873
	452.9	-13.5	5889
	450.9	-13.6	5904
	449.1	-13.6	5919
	447	-13.7	5935
	445	-13.6	5950
	443.2	-13.7	5965
	441.7	-13.7	5981
	439.9	-13.7	5996
	438.8	-13.9	6011
	437.3	-13.6	6026
	436.1	-13.7	6042
	434.6	-13.9	6057
	433.2	-13.9	6073
	431.7	-13.9	6088
	429.7	-14	6103
	427.9	-13.9	6119
	425.8	-13.9	6134
	424.1	-14.1	6149
	422.6	-14.2	6165
	420.9	-13.9	6180
	419.4	-14	6195
	418	-13.9	6211
	416.5	-13.9	6226
	415	-14.3	6241
	413.3	-14.1	6256
	411.8	-14.3	6272
	410.1	-14.2	6287
	408.9	-14.2	6302
	407.5	-14.5	6318
	406	-14.1	6333
	404.3	-14.2	6348
	402.5	-14.2	6364
	400.8	-14.4	6379
	398.7	-14.4	6394
	396.7	-14.4	6410
	394.7	-14.3	6425
	392.9	-14.4	6440
	390.6	-14.6	6456
	388.3	-14.2	6471
	386	-14.3	6486
	384	-14.2	6502
	381.7	-14.3	6517
	379.3	-14.3	6532
	377.3	-14.3	6548
	375.3	-14.2	6563
	373	-14.1	6578
	371.3	-14.3	6593
	369.6	-14.2	6609
	367.8	-14.3	6624
	365.8	-14.3	6639
	364.1	-14.2	6654
	362.1	-14.2	6670
	360.4	-14.1	6685
	358.7	-14.1	6700
	356.9	-14	6716
	355.5	-13.9	6731
	354.4	-14	6746
	352.9	-13.7	6761
	351.8	-13.9	6777
	350.9	-13.8	6792
	349.8	-13.8	6807
	348.9	-13.7	6823
	348.1	-13.7	6838
	346.9	-13.7	6853
	345.8	-13.8	6868
	344.1	-13.8	6884
	342.4	-13.8	6899
	340.4	-13.9	6914
	338.4	-13.4	6930
	336.4	-13.6	6945
	334.1	-13.7	6960
	332.1	-13.7	6975
	329.9	-13.6	6991
	328.2	-13.6	7006
	326.8	-13.6	7021
	325.3	-13.8	7036
	323.6	-13.6	7052
	322.2	-13.7	7067
	320.8	-13.6	7082
	319.4	-13.8	7097
	318	-13.6	7113
	316.6	-13.4	7128
	315.4	-13.7	7143
	314	-13.8	7158
	312.6	-13.7	7174
	310.9	-13.7	7189
	309.2	-13.9	7204
	307.3	-13.7	7219
	305	-13.7	7234
	302.8	-13.6	7250
	300.5	-13.8	7265
	298.3	-13.7	7280
	296	-13.7	7296
	293.5	-13.6	7311
	291.5	-13.7	7326
	289.6	-13.9	7341
	287.3	-13.8	7356
	285.4	-13.5	7372
	283.1	-13.8	7387
	280.9	-13.8	7402
	278.7	-13.8	7417
	276.2	-13.7	7433
	273.9	-13.8	7448
	271.4	-13.7	7463
	268.9	-14	7478
	266.4	-13.8	7493
	264.2	-13.8	7509
	262	-14	7524
	259.8	-13.9	7539
	257.8	-13.9	7554
	255.6	-14	7569
	253.4	-13.9	7584
	251.2	-13.8	7600
	249.2	-13.9	7615
	247	-14.1	7630
	244.5	-14.1	7645
	242.3	-14	7660
	240.1	-14	7675
	237.9	-14.1	7690
	235.7	-14.3	7706
	233.3	-14.3	7721
	231.1	-14.6	7736
	228.6	-14.1	7751
	226.1	-14.3	7766
	223.6	-14.3	7781
	221.5	-14.3	7797
	219	-14.4	7812
	216.5	-14.6	7827
	214.1	-14.4	7842
	211.3	-14.5	7857
	208.9	-14.6	7872
	206.2	-14.8	7888
	203.7	-14.7	7903
	201.3	-14.8	7918
	198.8	-14.7	7933
	196.4	-14.9	7948
	194.2	-14.9	7963
	191.7	-15.1	7978
	189.3	-14.9	7994
	186.9	-15.1	8009
	184.7	-15.2	8024
	182.3	-15.3	8039
	180.1	-15.1	8054
	177.7	-15.3	8069
	175.2	-15.3	8084
	172.8	-15.2	8100
	170.4	-15.5	8115
	168	-15.4	8130
	165.5	-15.4	8145
	163.1	-15.5	8160
	160.7	-15.3	8175
	158.5	-15.2	8191
	156.4	-15.4	8205
	154.5	-15.3	8221
	152.1	-15.5	8236
	150	-15.4	8251
	148.1	-15.4	8266
	145.9	-15.4	8281
	144.1	-15.3	8296
	141.9	-15.4	8311
	139.8	-15.3	8326
	137.7	-15.4	8341
	135.5	-15.5	8356
	133.4	-15.4	8371
	131	-15.5	8387
	128.6	-15.2	8402
	126.5	-15.4	8417
	124.4	-15.4	8432
	122.2	-15.3	8447
	119.8	-15.2	8462
	117.7	-15.1	8477
	115.6	-15.2	8492
	113.5	-15.3	8507
	111.6	-15.1	8522
	109.5	-15	8537
	107.7	-15	8552
	105.5	-15	8567
	103.7	-14.8	8582
	101.6	-14.9	8597
	99.7	-15	8612
	97.9	-14.8	8627
	95.8	-14.7	8642
	93.7	-14.7	8657
	91.8	-14.6	8672
	90.3	-14.8	8687
	88.7	-14.5	8702
	87.1	-14.6	8718
	85.5	-14.4	8732

## Sheet: AL011
Thermomagnetic results
Sample	TEMP	TSUSC	TIME
AL011	(°C)	(°C)	(s)
	16.2	216.8	0
	16.4	211.1	16
	17.7	212.2	31
	19.2	212.3	46
	21.3	212.4	61
	23.4	212.6	76
	25.2	212.5	92
	27	212.6	106
	29	212.9	122
	30.8	213	137
	32.4	213.2	152
	34.2	213.2	167
	35.8	213.4	182
	37.3	213.5	197
	38.9	213.9	212
	40.4	213.9	227
	42	214.2	242
	43.5	214.1	257
	44.8	214.4	272
	46.4	214.6	287
	47.9	214.9	302
	49.5	215.3	317
	51.1	215.3	332
	52.6	215.5	347
	54.2	215.9	363
	56	215.9	378
	57.6	216.3	393
	59.4	216.5	408
	61.2	216.6	423
	63	217	438
	64.9	217.2	453
	66.7	217.4	468
	68.2	217.7	483
	70.1	217.8	498
	71.6	218.3	513
	73.2	218.5	528
	75	218.8	543
	77.1	219.2	558
	78.7	219.6	573
	80.5	220	588
	82.4	220	604
	84.2	220.6	619
	86.3	220.7	634
	88.4	221.2	649
	90.8	221.6	664
	93.2	221.9	679
	95.5	222.6	694
	97.9	222.9	709
	100	223.3	724
	102.1	223.8	739
	104	224.3	755
	106.3	224.5	770
	108.5	225.2	785
	110.8	225.6	800
	112.9	226	815
	115.1	226.6	830
	117.2	227.1	845
	119	227.6	861
	120.9	227.3	876
	123	228.1	891
	125.2	228.6	906
	127.3	228.7	921
	129.7	229	936
	132.1	229.9	951
	134.2	230.1	966
	136.6	230.5	982
	139	230.7	997
	141.1	230.9	1012
	143.3	231.6	1027
	145.7	231.9	1042
	148.1	231.9	1057
	151	231.6	1075
	153.7	232.5	1093
	155.9	233.8	1108
	158.5	234.3	1124
	161.2	234.8	1142
	163.6	234.8	1158
	166.1	234.5	1175
	168.8	235.7	1192
	171.5	235.7	1208
	173.9	236.3	1225
	176.9	236.7	1242
	179.3	236.6	1259
	182	237.6	1276
	184.4	240.1	1292
	187.1	240	1309
	189.8	239	1326
	192.6	240.4	1343
	195.3	240.7	1359
	197.7	240.9	1376
	200.2	241.4	1393
	202.6	244.8	1410
	204.8	245.2	1426
	207.2	243.9	1443
	210	244.3	1460
	212.4	245.4	1476
	214.9	246.3	1493
	217.6	246.7	1510
	220.4	246.9	1527
	223.4	247.5	1543
	226.4	249.4	1560
	229.4	249.9	1577
	232.7	250.4	1594
	235.7	250.9	1610
	238.5	251.8	1627
	241.5	250.9	1644
	244.3	252.7	1661
	247.3	253.4	1677
	250.3	254.3	1694
	253.1	254.1	1711
	255.9	255	1728
	258.7	256	1744
	261.4	255.6	1761
	264.2	256	1778
	267	256.2	1795
	269.8	256.6	1812
	272.5	258.9	1829
	275.6	257.6	1845
	278.7	256.1	1862
	281.2	258.4	1879
	284.3	258.7	1896
	286.8	259.8	1912
	289.6	257.4	1929
	292.4	259.5	1946
	295.2	260.2	1963
	298	259.2	1979
	300.8	259.2	1996
	303.9	259.2	2013
	307	259	2030
	309.8	260.8	2047
	312.6	259.1	2064
	315.2	258.3	2080
	318	258.5	2097
	321.1	259.5	2114
	323.9	259.1	2131
	326.8	259.9	2148
	329.6	261	2164
	332.4	258.5	2181
	335.3	259.1	2198
	338.1	259.7	2215
	341	259.1	2232
	343.8	260.8	2248
	346.9	260.7	2265
	350.1	260	2282
	353.2	260.6	2299
	356.1	259.5	2316
	359.2	259.6	2333
	362.4	260.3	2349
	365.3	260.5	2366
	368.4	259.2	2383
	371	258.5	2400
	373.3	259.2	2416
	375.9	258	2433
	378.5	257.2	2450
	381.1	257	2467
	383.4	255.8	2484
	386	254.4	2501
	388.3	255.1	2517
	390.3	252.5	2534
	392.4	252.3	2551
	394.4	250.9	2568
	396.4	249.4	2585
	398.7	248.9	2601
	401.1	247.5	2618
	403.7	241.8	2635
	406.3	244.4	2652
	408.9	242.6	2669
	411.5	239	2686
	414.4	237.4	2702
	417.7	235.3	2719
	420.9	236.5	2736
	423.8	235.7	2753
	426.7	233.2	2770
	429.7	231.9	2787
	432.6	231.4	2804
	435.5	230.3	2821
	438.2	229.4	2838
	441.1	227.3	2854
	444.4	228.4	2871
	447.3	227.4	2888
	450.3	228.5	2905
	453.5	226.6	2922
	456.5	227	2939
	459.1	227	2955
	461.5	226.3	2971
	464.8	225.7	2988
	467.7	226.4	3004
	471	226.4	3019
	474	226.3	3034
	477.6	227.7	3052
	480.2	226.2	3067
	482.9	225.1	3084
	485.9	226.4	3101
	488.6	228.6	3118
	491.6	227.2	3134
	494.3	228.4	3151
	497.6	227	3168
	500.6	226.4	3185
	503.6	231.6	3202
	506.9	228.7	3219
	509.9	228.9	3236
	513.6	228.4	3253
	516.9	229.1	3270
	519.9	230.7	3287
	523.2	230.9	3303
	526.6	233.2	3320
	529.6	229.3	3337
	532.4	232.1	3354
	535.4	231.9	3371
	537.8	232	3388
	541.2	233.2	3405
	544.5	233.2	3422
	547.6	235.4	3439
	551	236.6	3456
	554.3	234.5	3473
	557.7	235.6	3490
	561.1	232.8	3507
	564.1	221.4	3522
	567.5	200.2	3538
	570.6	167.1	3553
	573.7	128.2	3568
	576.8	97.9	3584
	579.5	73	3599
	582.9	51.5	3615
	586	31	3630
	588.8	13.4	3645
	591.6	-2.3	3661
	594.1	-16.9	3676
	596.9	-31	3692
	599.4	-41.7	3707
	602.2	-50.9	3723
	604.7	-58.5	3738
	607.2	-64.1	3753
	610	-67.6	3769
	613.1	-70.9	3784
	616.6	-73.9	3799
	619.4	-76.3	3815
	622.5	-78.1	3830
	625.7	-79.4	3846
	629.1	-81.5	3861
	632	-82.8	3877
	634.8	-84.1	3892
	638.3	-85.5	3907
	641.4	-87.4	3923
	644.9	-88.2	3938
	648.7	-89.1	3954
	651.9	-90.9	3969
	655.1	-91.4	3985
	657.9	-93.1	4000
	660.8	-94.2	4015
	664	-95.4	4031
	667.2	-96.2	4046
	670.3	-97.5	4062
	673.2	-98.1	4077
	676.4	-98.9	4092
	679.6	-99.9	4108
	682.8	-100.5	4123
	686	-101.4	4139
	689.6	-101.9	4154
	692.8	-102.6	4169
	696	-103.4	4185
	699.3	-103.6	4200
	702.5	-103.6	4216
	704.1	-104.3	4231
	704.4	-104.5	4247
	704.1	-104.6	4262
	703.1	-104.4	4277
	701.5	-104.4	4293
	699.9	-104.5	4308
	698.3	-104.5	4324
	696.4	-104.2	4339
	694.7	-104.3	4355
	692.8	-103.7	4370
	690.9	-103.5	4385
	688.9	-102.7	4401
	687.3	-102.4	4416
	684.8	-102.5	4432
	682.5	-101.8	4447
	680.9	-100.8	4463
	679	-100.6	4478
	676.7	-100.2	4493
	674.8	-99.6	4509
	672.9	-98.8	4524
	671	-97.6	4539
	669.1	-97.5	4555
	666.8	-96.7	4570
	664.9	-95.8	4586
	662.7	-95.2	4601
	660.5	-94	4617
	658.6	-92.8	4632
	656.6	-92.7	4647
	654.1	-92	4663
	652.2	-90.6	4678
	650	-90.2	4694
	647.8	-89.9	4709
	645.9	-89.1	4725
	643.6	-88.1	4740
	641.4	-87.2	4755
	638.9	-85.4	4771
	636.1	-84.6	4786
	633.9	-83.6	4802
	631.3	-82.2	4817
	628.8	-81.2	4833
	626.3	-78.9	4848
	623.8	-77.2	4863
	621.6	-74.8	4879
	618.8	-71.8	4894
	616.3	-69.1	4910
	613.8	-66.4	4925
	611.3	-61.9	4941
	608.8	-56.4	4956
	605.9	-48.9	4971
	603.8	-41.1	4987
	601.3	-32.1	5002
	598.8	-21.3	5018
	596.3	-8.8	5033
	594.1	4.5	5048
	591.3	20	5064
	588.5	36.5	5079
	585.7	54.1	5095
	582.9	73.3	5110
	580.5	93.9	5125
	577.7	114.8	5141
	575.5	135.9	5156
	573.4	161.2	5172
	570.9	187.1	5187
	568.4	204.8	5203
	566	209.5	5218
	563.2	208.7	5233
	560.5	206.5	5249
	558	203.8	5264
	555.2	201.4	5279
	552.5	198.1	5295
	550	195.5	5310
	547.9	192.7	5325
	545.8	189.7	5341
	543.3	188.4	5356
	540.6	185.4	5372
	538.4	183.3	5387
	536	180.5	5402
	533.6	177.6	5418
	531.1	175.2	5433
	528.7	172.4	5449
	525.7	169.7	5464
	522.9	166.9	5479
	520.2	164.1	5495
	517.8	161.4	5510
	515.4	158.6	5526
	513.3	156.5	5541
	510.9	154	5557
	508.4	150.7	5572
	506	147.9	5587
	503.9	143.9	5603
	501.5	139.8	5618
	499.1	138.1	5633
	496.7	137.1	5649
	494.3	136.1	5664
	491.9	135.2	5679
	489.2	134.8	5695
	486.8	134	5710
	484.4	133.8	5725
	482	133.2	5741
	479.4	132.6	5756
	476.7	132.4	5771
	473.7	132.4	5787
	470.7	131.9	5802
	468	131.7	5818
	465.7	131.3	5833
	463.3	130.9	5848
	461.2	131	5863
	459.4	130.7	5879
	457.7	130.4	5894
	455.9	130.4	5909
	453.8	130	5925
	451.7	129.8	5940
	450	129.8	5955
	447.9	129.5	5971
	445.5	129.4	5986
	443.5	129.4	6001
	441.4	129.4	6016
	439.6	129.4	6032
	437.6	128.8	6047
	435.5	129.3	6062
	433.8	128.9	6078
	432	128.7	6093
	430.2	128.4	6108
	428.8	128.3	6124
	427.3	128.4	6139
	425.8	128	6154
	424.4	128.3	6170
	422.6	128	6185
	421.2	127.8	6200
	419.4	128.1	6215
	418	127.9	6230
	416.5	127.5	6246
	415	127.8	6261
	413.9	127.5	6276
	412.7	127.3	6292
	411.8	127.5	6307
	410.7	127.9	6322
	409.5	127.4	6338
	408	127.1	6353
	406.6	127.7	6368
	405.4	127.6	6383
	404.3	127.5	6398
	403.4	127.3	6414
	401.9	127.5	6429
	400.5	127.5	6444
	399	127.4	6460
	397.3	127.4	6475
	395.3	127	6490
	392.9	127.3	6505
	390.9	127.3	6520
	389.2	127.2	6536
	387.1	127.2	6551
	384.8	127.1	6566
	382.8	127.2	6582
	381.1	127.3	6597
	379.3	127.4	6612
	377.9	127.2	6627
	376.5	127.6	6642
	375.3	127.3	6658
	373.9	127.6	6673
	372.4	127.6	6688
	370.7	127.9	6703
	369	127.9	6719
	367.5	127.6	6734
	366.1	127.9	6749
	364.7	128.2	6764
	363.5	128.2	6779
	362.4	128.2	6795
	360.9	128.2	6810
	359.5	128	6825
	358.1	128.4	6841
	356.7	128.5	6856
	355.2	128.2	6871
	353.8	128	6886
	352.6	128.4	6901
	351.2	128.4	6916
	349.8	128.4	6931
	348.4	128.4	6946
	346.7	128.3	6962
	344.7	128.2	6977
	342.7	128.1	6992
	341	128.1	7007
	339.5	128.2	7022
	338.1	128.2	7037
	336.4	128.1	7053
	335	127.9	7068
	333.8	127.9	7083
	332.4	128.1	7098
	330.7	128.1	7113
	329.3	128	7129
	327.9	128	7144
	326.5	127.6	7159
	325.1	127.8	7174
	323.9	127.7	7189
	322.8	127.4	7205
	321.4	127.5	7220
	320.2	127.5	7235
	318.8	127.4	7250
	317.7	127.4	7265
	316	127.3	7280
	314.6	127.5	7295
	313.2	127.5	7311
	311.8	127.1	7326
	310.1	127.3	7341
	308.4	127.1	7356
	306.4	127	7371
	305	127	7386
	303.6	126.9	7402
	301.9	127.3	7417
	300.2	126.9	7432
	298.5	126.7	7447
	296.9	126.5	7462
	295.5	126.3	7478
	294.1	126.5	7493
	292.7	126.8	7508
	290.7	126.3	7523
	289	126.4	7538
	287.6	126.2	7553
	285.9	126.1	7568
	284.5	126.1	7584
	282.9	126	7599
	281.5	126	7614
	280.1	126	7629
	278.4	125.7	7644
	277	125.7	7659
	275.6	125.9	7674
	274.2	126	7690
	273.1	125.8	7705
	272	125.9	7720
	270.9	125.5	7735
	269.8	125.6	7750
	268.4	125.9	7765
	267	125.6	7781
	265.9	125.6	7796
	264.5	125.2	7811
	262.8	125.4	7826
	260.9	125.2	7841
	258.9	125	7856
	257	125	7871
	254.8	125	7886
	252.8	124.8	7901
	251.2	124.7	7916
	249.2	124.9	7932
	247.3	124.6	7947
	245.4	124.7	7962
	243.2	124.6	7977
	241.2	124.4	7992
	239.3	124.3	8007
	237.1	124.2	8022
	235.2	124.2	8037
	233.3	124.2	8052
	231.1	124.1	8067
	229.1	123.9	8082
	227.2	123.9	8097
	225.3	123.7	8112
	223.6	123.5	8127
	221.5	123.3	8142
	219.5	123.5	8157
	217.4	123.3	8173
	214.9	123.2	8188
	212.4	123	8203
	210.2	122.9	8218
	207.8	122.8	8233
	205.3	122.4	8248
	203.2	122.3	8263
	200.7	122.1	8278
	198.5	122	8293
	196.1	122	8308
	193.9	121.8	8323
	191.5	121.6	8338
	189	121.4	8353
	186.9	121.3	8368
	184.4	121.2	8383
	182.3	121	8398
	179.8	120.9	8413
	177.4	120.9	8428
	175.2	120.7	8443
	172.8	120.6	8458
	170.4	120.4	8473
	168	120.6	8488
	165.3	120.2	8503
	162.8	120.1	8518
	160.4	120.1	8533
	158	120.1	8548
	155.9	120	8563
	153.7	119.7	8578
	151.8	119.8	8593
	149.4	119.9	8608
	147.3	119.9	8623
	145.1	119.8	8638
	143	119.9	8653
	140.6	119.7	8668
	138.5	119.6	8683
	136.3	119.7	8698
	134.2	119.6	8713
	132.1	119.5	8728
	129.9	119.6	8743
	127.5	119.6	8758
	125.4	119.5	8773
	123	119.6	8788
	120.9	119.4	8803
	118.8	119.4	8818
	116.9	119.5	8833

## Sheet: AL017
Thermomagnetic results
Sample	TEMP	TSUSC	TIME
AL017	(°C)	(°C)	(s)
	17.4	651.2	0
	17.4	651.5	18
	18.7	651.7	35
	21	652.2	52
	23.9	651.9	68
	26.2	652.3	85
	28.8	652.6	101
	31.1	653.1	118
	33.2	653.2	134
	35.5	653.1	151
	37.6	654.2	168
	39.4	654.2	184
	41.5	653.6	201
	43.3	653.9	217
	45.1	653.7	234
	46.9	654.9	250
	48.7	655.1	266
	50.5	655	283
	52.4	655.4	300
	54.2	654.7	316
	56.3	655.5	333
	58.1	655.7	349
	59.9	656.4	365
	61.7	656.4	382
	63.5	657.3	399
	65.6	656.7	415
	67.5	656.8	432
	69.6	657.7	448
	71.4	656.9	465
	73.2	658.2	481
	75	658.4	498
	76.9	658.5	515
	78.7	659.5	531
	80.5	658.4	548
	82.6	658.2	564
	84.5	658.3	581
	86.3	658.7	598
	88.2	659.9	614
	90	660.1	631
	92.4	660.1	648
	94.7	660.4	664
	97.1	661.3	681
	99.7	661.8	697
	102.1	662.8	714
	104.8	662.1	730
	107.4	663.2	747
	110	664	764
	112.4	664.3	781
	115.1	664	797
	117.2	665.3	814
	119.6	665.6	830
	121.7	666.8	847
	123.8	667.5	864
	125.9	667.6	880
	128.1	667.8	897
	130.5	668.8	914
	132.9	668.4	930
	135.5	670.1	947
	138.2	670.3	964
	140.6	671	980
	143.3	671.2	997
	145.9	672	1014
	148.4	671.9	1030
	150.8	672.4	1047
	153.4	673.3	1064
	156.1	673.6	1080
	158.5	675	1097
	161	674.6	1114
	163.4	675.7	1130
	165.8	676	1147
	168.2	675.3	1164
	170.9	677.1	1180
	173.3	677.6	1197
	176	678.2	1214
	178.5	678.8	1230
	180.9	679.9	1247
	183.6	679.7	1264
	186.3	680.8	1281
	188.5	681.8	1297
	190.9	682.3	1314
	193.4	682.7	1331
	195.8	683.9	1347
	198.5	685	1364
	201	686.2	1381
	203.4	685.4	1398
	205.9	687.7	1415
	208.3	687.9	1431
	211.1	688.5	1448
	213.5	689.2	1465
	216.5	690.6	1481
	219.3	691.2	1498
	222	692	1515
	225	692.9	1532
	227.8	693.2	1548
	230.5	694.6	1565
	233.3	696.1	1582
	235.7	695.9	1599
	238.2	697.3	1615
	240.7	698.2	1632
	243.2	697.7	1649
	245.9	700.6	1666
	249	699.5	1682
	251.7	700.2	1699
	254.5	701.6	1716
	257	702.6	1733
	259.8	703	1749
	262.5	704.7	1766
	265	703.7	1783
	267.8	705.1	1800
	270.3	706.1	1816
	273.1	707.4	1833
	275.9	707.6	1850
	278.4	709.6	1867
	281.2	709.7	1884
	283.7	710.3	1900
	286.2	711.7	1917
	289	714.1	1934
	291.5	713.6	1951
	294.3	714.3	1967
	297.1	714.7	1984
	299.9	716.4	2001
	302.8	716.5	2018
	305.3	717.7	2034
	308.1	718.3	2051
	310.9	719.5	2068
	313.7	719.5	2085
	316.6	719.5	2102
	319.4	719.4	2119
	322.5	720.9	2135
	325.6	721.3	2152
	328.5	721.1	2169
	331.3	720.5	2186
	334.1	722.3	2203
	336.7	721.6	2219
	339.5	720.1	2236
	342.4	720.2	2253
	345.2	718.3	2270
	348.1	715.2	2286
	350.9	714.5	2303
	353.8	711.2	2320
	356.4	709.2	2337
	359.5	703.8	2354
	362.4	699.3	2371
	365.3	692.8	2387
	367.8	685	2404
	370.7	678.3	2421
	373.3	671.3	2438
	376.2	661.9	2455
	378.8	654.2	2472
	381.4	644.2	2488
	384.3	635.1	2505
	386.9	627.3	2522
	390	618.5	2539
	393.2	609.3	2556
	396.1	600.3	2572
	399	593	2589
	401.9	586.9	2606
	404.8	581.7	2623
	407.5	574.3	2640
	410.4	570	2657
	413	562.9	2674
	415.9	558.5	2690
	418.5	549.5	2707
	421.5	547.4	2724
	424.4	544.6	2741
	427.6	541	2758
	430.5	535.3	2775
	433.8	533.3	2791
	436.7	528.6	2808
	439.6	526.2	2825
	442.6	522.2	2842
	445.5	521.2	2859
	448.2	517.9	2876
	451.1	516.3	2893
	453.8	515.2	2910
	457.1	512.7	2927
	459.7	510.8	2944
	462.7	510.9	2961
	465.7	510.1	2978
	468.3	509.6	2994
	471.3	508.6	3011
	474	506.2	3028
	477.3	508.8	3045
	480	507.1	3062
	482.6	507.3	3079
	485.3	507.6	3096
	488	507.7	3113
	491	509.1	3129
	494	508.4	3146
	496.7	507.9	3163
	499.7	509.5	3180
	503	508.9	3197
	505.7	508.6	3214
	508.7	509.3	3231
	511.8	509.2	3248
	514.8	509.3	3265
	517.5	510.3	3281
	520.5	511	3298
	523.2	511.4	3315
	526	510.6	3332
	529	512	3349
	531.7	513.5	3366
	534.8	511.9	3383
	537.5	515.3	3400
	540.3	516.5	3417
	543.3	515.3	3434
	546.7	517.8	3450
	549.4	517.5	3467
	552.5	519	3484
	555.8	517.5	3501
	558.9	511.3	3518
	562.3	470.8	3535
	565.7	400.3	3552
	569.4	325	3569
	572.8	265.5	3586
	576.5	222.2	3601
	579.9	173	3617
	583.6	121.9	3632
	586.7	75.8	3647
	589.5	33.5	3663
	592.2	-2.9	3678
	594.7	-34.9	3694
	597.5	-62.3	3709
	600.6	-86.3	3724
	603.4	-100.6	3740
	606.3	-107.3	3755
	608.8	-111.4	3771
	611.6	-113.7	3786
	614.7	-115.6	3802
	617.8	-117.1	3817
	620.6	-118.1	3832
	623.5	-118.3	3848
	626.3	-119.5	3863
	629.4	-119.7	3879
	632.3	-120.6	3894
	635.4	-120.8	3909
	638.6	-121.6	3925
	641.7	-121.7	3940
	645.2	-122.4	3956
	648.4	-122.8	3971
	651.6	-123.4	3986
	655.1	-123.7	4002
	658.2	-124.9	4017
	661.1	-125.2	4033
	663.3	-125.8	4048
	665.9	-126.5	4063
	669.1	-127.2	4079
	671.9	-127.9	4094
	675.1	-128.3	4110
	679	-128.6	4125
	682.5	-128.9	4141
	686.4	-129.6	4156
	689.9	-130.1	4172
	692.8	-130.4	4187
	695.7	-131.2	4202
	699.3	-132.3	4218
	702.5	-133.1	4233
	705.4	-133.3	4249
	707.3	-133.7	4264
	708.6	-133.9	4280
	708.6	-133.7	4295
	708	-133.7	4310
	707	-133.7	4326
	705.1	-133.3	4341
	703.5	-132.8	4357
	701.5	-132.7	4372
	699.9	-132.7	4388
	698	-132	4403
	696	-130.8	4418
	694.1	-130.7	4434
	692.2	-130.3	4449
	690.2	-130	4465
	688	-129.7	4480
	685.7	-129.4	4496
	683.2	-128.9	4511
	680.9	-128.7	4527
	678.7	-128.5	4542
	677.1	-127.8	4558
	674.8	-127.3	4573
	672.6	-126.6	4588
	670.3	-126.4	4604
	668.1	-125.7	4619
	665.9	-125.7	4635
	663.6	-125.2	4650
	661.4	-125.1	4666
	659.2	-124.6	4681
	656.6	-124.2	4697
	654.4	-123.8	4712
	652.2	-123.5	4727
	650	-123.1	4743
	647.8	-122.3	4758
	645.9	-122	4774
	643.6	-121.7	4789
	641.1	-121	4804
	638.6	-120.9	4820
	636.4	-120.3	4835
	634.2	-119.8	4851
	631.6	-119.3	4867
	629.4	-118.7	4882
	627.2	-118.3	4897
	625	-117.7	4913
	622.5	-117	4928
	620.3	-115.9	4944
	618.1	-115.2	4959
	615.6	-113.9	4975
	613.1	-111	4990
	610.3	-105.2	5006
	607.2	-96.5	5021
	604.4	-84.9	5036
	601.6	-70.5	5052
	598.8	-54.6	5067
	596	-35.1	5083
	593.2	-14.9	5098
	590.7	5.9	5114
	588.2	28.4	5129
	585.7	56.7	5144
	583.6	81	5160
	580.8	104.8	5175
	578.3	129.7	5191
	575.5	155.5	5206
	573.1	178.5	5222
	570.9	206.3	5237
	568.1	252.1	5254
	565.7	287.2	5271
	563.2	311.4	5288
	560.8	320.5	5305
	557.7	323.8	5322
	554.9	324.2	5338
	552.2	324.8	5355
	550	323.9	5372
	547.6	324.1	5390
	545.8	323.6	5406
	543.9	325	5423
	541.8	322.9	5440
	539.7	323.4	5457
	537.5	320.7	5474
	535.4	322.3	5491
	532.4	321	5508
	529.3	322.5	5525
	526.6	319.8	5542
	523.2	321.1	5559
	520.2	321	5576
	517.8	319	5593
	515.4	319.7	5609
	512.7	319.5	5626
	509.9	319.3	5644
	507.5	318.1	5660
	504.5	318	5677
	502.1	317.9	5694
	499.4	317.8	5711
	496.7	316.1	5728
	493.7	317	5745
	491.3	316.5	5762
	488.6	314.3	5779
	485.6	314.5	5796
	482.9	315.5	5813
	480	317.3	5830
	477	313.8	5846
	474	314.8	5863
	471	315.4	5880
	468	314.5	5897
	465.7	314	5914
	463.9	314.8	5931
	462.1	313.7	5948
	460	313.9	5965
	458.2	313.6	5982
	455.9	312.6	5998
	453.2	313.7	6016
	450.9	313.5	6032
	447.9	311.9	6049
	445	312	6066
	441.7	311.8	6083
	439.1	311.9	6100
	436.4	310.9	6117
	434.1	310	6134
	431.7	310.9	6150
	429.1	310.8	6167
	426.4	308.3	6184
	423.8	310.8	6201
	421.8	311	6218
	419.7	308.9	6235
	417.7	310.5	6252
	415.3	310.3	6268
	413.3	309.1	6285
	411.2	308.8	6302
	409.2	309	6319
	407.5	308.6	6336
	405.1	308.6	6353
	403.1	308.7	6370
	401.1	305.9	6387
	398.7	308.2	6404
	396.4	306.5	6420
	394.4	307.5	6437
	392.1	307.5	6454
	389.5	307.2	6471
	387.4	305.5	6488
	385.1	305.6	6505
	383.1	306	6522
	381.7	306.5	6538
	379.9	305.7	6555
	378.5	304.7	6572
	377	305.3	6589
	375.6	305.1	6606
	373.9	304.5	6623
	372.1	306	6639
	370.4	302.8	6656
	368.7	304.3	6673
	366.4	304.1	6690
	364.4	302.8	6707
	362.7	303.2	6724
	360.4	302.3	6741
	358.4	302	6757
	356.4	302.4	6774
	354.1	302.4	6791
	351.8	302.2	6808
	348.9	300.8	6825
	345.8	302	6841
	342.9	302.4	6858
	340.4	300.8	6875
	337.8	299.8	6892
	335.3	299.9	6909
	333	301	6926
	330.7	298.7	6942
	328.7	299.3	6959
	326.8	299	6976
	324.5	298.8	6993
	321.9	297.4	7010
	319.4	298.2	7027
	316.8	298.3	7043
	314	297.2	7060
	311.5	296.3	7077
	309	295.7	7094
	306.1	298	7111
	303.6	294.6	7127
	300.8	296	7144
	298	293.9	7161
	295.5	296.9	7178
	292.7	295.7	7195
	289.9	293.6	7212
	287.1	293.9	7228
	284.3	294.1	7245
	281.5	293.9	7262
	278.7	294.2	7279
	275.9	291.2	7295
	273.1	292.3	7312
	270	291	7329
	267	292.2	7346
	264.2	291.4	7363
	261.4	291.5	7379
	258.4	290.3	7396
	255.6	291.7	7413
	252.6	290.4	7430
	249.8	290	7447
	247	290.9	7463
	244.3	288.9	7480
	241.5	289.7	7497
	238.8	288.7	7513
	236	287.9	7530
	233.3	286.7	7547
	230.5	286.9	7564
	227.8	287	7581
	225.3	286.1	7597
	222.6	287.2	7614
	219.8	284	7631
	217.1	284.6	7647
	214.3	283.9	7664
	211.9	283.5	7681
	209.2	282.2	7698
	206.2	281.7	7714
	203.2	281	7731
	200.4	281.5	7748
	197.4	280.5	7764
	194.7	280.9	7781
	192	277.5	7798
	189.3	278.6	7814
	186.6	278.3	7831
	183.9	278.3	7848
	181.2	279.3	7865
	178.7	276.2	7881
	176	275.7	7898
	173.6	275.2	7915
	170.9	274.7	7931
	168.2	274.6	7948
	165.5	274.1	7965
	162.6	273.6	7981
	159.9	275.3	7998
	157.2	275.1	8015
	154.5	274.6	8031
	152.1	274	8048
	149.7	275	8065
	147.3	272.4	8082
	145.1	272.2	8098
	142.7	272.8	8115
	140.3	272.9	8132
	138.2	274	8148
	135.8	273.8	8165
	133.1	273.6	8181
	130.7	272.7	8198
	128.3	272.5	8215
	125.7	272.6	8231
	123	273.8	8248
	120.6	274.3	8265
	118	274.1	8281
	115.6	274.6	8298
	113.2	274.6	8314
	110.8	273	8331
	108.7	274.6	8348
	106.3	273.7	8364
	104	275.6	8381
	101.8	274.7	8398
	99.7	274.4	8414
	97.4	275.6	8431
	95.3	275.1	8447
	93.2	273.7	8464
	91	274.9	8481
	88.9	275.7	8497
	86.8	276	8514
	84.5	276.1	8530
	82.4	275.5	8547
	80.3	275.9	8563
	78.2	275.6	8580
	76.4	275.2	8596
	74.3	276	8613
	72.4	276.8	8629
	70.6	276.5	8646
	68.8	275.7	8663
	66.9	276.2	8679
	65.1	276.4	8696
	63.3	277.3	8712
	61.5	276.8	8729
	59.6	276.6	8745
	57.6	276.1	8763
	54.2	276.3	8779
	50.3	276.9	8796
	46.4	276.8	8812

## Sheet: AL031
Thermomagnetic results
Sample	TEMP	TSUSC	TIME
AL031	(°C)	(°C)	(s)
	15.4	150.4	0
	15.6	151.6	16
	17.2	151.8	31
	19.2	151.7	46
	21.3	151.7	61
	23.6	151.6	76
	25.7	151.9	91
	27.7	152	106
	29.8	151.9	121
	31.6	152.1	136
	33.7	152.3	152
	35.2	152.2	167
	37.1	152.6	182
	38.9	152.7	197
	40.4	152.8	212
	42.2	153	227
	43.8	153	242
	45.6	153.2	257
	47.2	153.3	272
	48.5	153.6	287
	50.3	153.7	302
	51.8	153.9	317
	53.4	154.1	332
	55	154.3	348
	56.8	154.2	363
	58.3	154.5	378
	59.9	154.7	393
	61.5	154.7	408
	63	154.8	423
	64.9	155.1	438
	66.4	155.1	453
	68.2	155.3	468
	70.1	155.3	483
	71.6	155.6	498
	73.2	155.8	513
	75	156.1	528
	76.6	156.3	544
	78.4	156.4	559
	80.5	156.6	574
	82.4	156.7	589
	84.2	157	604
	86.1	157.4	619
	88.2	157.3	634
	90.3	157.5	649
	92.6	157.6	664
	94.7	157.8	680
	96.8	157.9	695
	98.9	158.2	710
	101.1	158.5	725
	103.4	158.6	740
	105.5	158.9	755
	107.9	159.2	770
	110	159.4	785
	112.4	159.5	801
	114.5	159.7	815
	116.7	160.1	831
	118.5	160.1	846
	120.6	160.3	861
	122.5	160.5	876
	124.6	160.5	891
	126.5	160.6	906
	128.9	161	922
	131	161.1	936
	133.1	161.2	952
	135.3	161.5	967
	137.7	161.6	982
	139.8	161.9	997
	141.9	162.1	1012
	144.3	162	1027
	146.5	162.1	1043
	148.9	162.6	1058
	151	162.9	1073
	153.4	163.2	1088
	155.6	163.1	1103
	157.7	163.2	1118
	160.2	163.4	1133
	162.3	163.6	1148
	164.7	163.6	1163
	167.1	164.2	1179
	169.6	164.3	1194
	172	164.3	1209
	174.4	164.7	1224
	176.9	165.2	1239
	179	165.2	1255
	181.4	165.5	1270
	183.9	165.6	1285
	186.3	165.9	1300
	188.5	166.3	1315
	190.9	166.5	1330
	193.1	166.8	1346
	195.3	167.1	1361
	197.7	166.9	1376
	199.9	167.6	1391
	202.1	167.6	1406
	204.2	167.9	1421
	206.4	168.6	1437
	208.6	168.6	1452
	210.8	168.8	1467
	213	169.1	1482
	215.4	169.4	1497
	217.9	169.7	1513
	220.6	170.1	1528
	223.4	170.4	1543
	225.8	170.7	1558
	228.6	170.9	1573
	231.1	171.2	1588
	233.5	171.5	1604
	236.3	171.8	1619
	238.8	172	1634
	241.2	172.6	1649
	244	172.7	1664
	246.8	173	1680
	249.2	173.1	1695
	251.5	173.5	1710
	253.9	173.9	1725
	256.7	174	1741
	259.2	174.6	1756
	261.7	174.7	1771
	264.2	175	1786
	266.7	175.4	1801
	268.9	175.3	1817
	271.4	175.7	1832
	273.9	175.9	1847
	276.4	176.1	1863
	279	176.2	1878
	281.5	176.6	1893
	284	176.8	1908
	286.2	176.8	1923
	288.7	177	1939
	291.3	177	1954
	293.8	177.1	1969
	296.3	177.5	1984
	298.5	177.5	2000
	301.1	177.5	2015
	303.3	177.6	2030
	305.9	177.7	2045
	308.4	177.6	2061
	310.6	177.7	2076
	313.2	177.3	2091
	315.7	177.2	2106
	318.5	177.1	2122
	321.1	176.9	2137
	323.6	176.9	2152
	326.2	176.4	2167
	328.7	175.8	2183
	331.3	175.6	2198
	333.8	175.2	2213
	336.4	174.6	2228
	339	173.6	2244
	341.5	173.1	2259
	344.1	172.2	2274
	346.7	171.4	2289
	349.5	170.5	2305
	351.8	169.5	2320
	354.4	168.3	2335
	357.2	167.2	2351
	360.1	165.4	2366
	362.7	164.4	2381
	365.3	162.8	2396
	367.8	161.5	2412
	370.7	160.2	2427
	373.6	159	2442
	376.2	157.9	2458
	378.8	156.5	2473
	381.4	155.5	2488
	384.3	154.4	2503
	386.9	153.2	2519
	389.5	152.4	2534
	392.4	151.5	2549
	395.3	150.6	2565
	398.2	149.7	2580
	400.8	149.2	2595
	403.7	148.1	2611
	406.3	147.8	2626
	408.9	146.8	2641
	411.2	146.4	2657
	413.9	145.9	2672
	416.5	145.1	2687
	419.1	144.8	2702
	421.8	144	2718
	424.4	143.3	2733
	427	142.9	2749
	430	142.5	2764
	432.6	141.9	2779
	435.2	141.4	2794
	437.6	141.3	2810
	440.2	140.6	2825
	442.9	139.9	2840
	445.5	139.6	2855
	448.2	139	2871
	451.1	138.5	2886
	453.8	138.3	2902
	456.5	137.7	2917
	459.4	137.2	2932
	462.1	136.8	2948
	464.8	136.4	2963
	467.4	136	2978
	469.8	135.6	2994
	473.1	135.6	3009
	475.8	133.8	3024
	478.8	134.3	3040
	481.7	134.1	3055
	484.4	133.1	3071
	486.8	133.3	3086
	489.2	132	3101
	491.3	131.9	3117
	494	131.6	3132
	496.4	130.6	3147
	499.1	130.2	3162
	501.8	130.6	3178
	504.8	129.8	3193
	507.5	129.2	3209
	510.2	128.5	3224
	513	128.6	3239
	516	128	3255
	519	127.5	3270
	521.7	127.3	3285
	524.2	126.2	3301
	526.6	125.9	3316
	529.3	126	3332
	531.7	125.2	3347
	534.2	124.9	3362
	536.6	124.4	3378
	539	124	3393
	541.2	123.4	3409
	543.6	123.4	3424
	546.1	122.8	3439
	548.8	122.2	3455
	551.9	121.9	3470
	554.6	121.7	3486
	557.7	121	3501
	561.1	120	3516
	564.1	116.3	3532
	567.2	110.1	3547
	569.7	101.9	3562
	572.4	86.8	3578
	575.5	71.3	3593
	578.9	55.7	3609
	581.7	40.1	3624
	585.1	24.7	3639
	587.9	10.5	3655
	590.7	-3	3670
	593.5	-16.9	3685
	596.6	-29.8	3701
	599.4	-42.2	3716
	602.2	-53.7	3732
	605	-62.1	3747
	607.5	-70.4	3762
	610	-74.2	3778
	612.8	-76.6	3793
	615.9	-78.7	3809
	618.8	-80.2	3824
	621.6	-80.8	3839
	624.4	-81.2	3855
	626.9	-81.9	3870
	630.1	-83.1	3885
	632.9	-84	3901
	636.1	-84.3	3916
	639.2	-83.6	3932
	642.4	-85.2	3947
	645.2	-85.3	3963
	648.1	-86	3978
	650.3	-86.5	3993
	651.2	-86.4	4009
	652.2	-86.6	4024
	653.5	-87.6	4040
	656	-87	4055
	659.2	-87.7	4070
	662.7	-88.4	4086
	666.8	-88.8	4101
	671.6	-89.8	4117
	677.4	-90.5	4132
	683.5	-91.1	4148
	688	-91.6	4163
	692.5	-92.2	4178
	695.7	-92.6	4194
	699.6	-92.5	4209
	703.1	-93.6	4225
	706	-93.4	4240
	707.7	-94.1	4256
	708.3	-94.3	4272
	708	-94.3	4287
	707	-93.8	4303
	705.4	-94.8	4318
	703.8	-94.4	4334
	702.5	-94.8	4349
	700.5	-95	4365
	698.3	-94.8	4380
	695.7	-94.6	4396
	693.4	-94	4411
	691.2	-94.2	4427
	688.9	-94	4442
	686.7	-93.8	4457
	684.4	-93.7	4473
	682.2	-93.1	4488
	680.3	-93	4504
	678.7	-92.6	4519
	676.7	-92.2	4535
	674.5	-91.6	4550
	672.6	-92	4565
	670.7	-91.8	4581
	668.4	-91.4	4596
	666.5	-91.6	4612
	664.3	-90.9	4627
	662.1	-91.3	4642
	660.1	-91.4	4658
	657.9	-91	4673
	655.7	-91.4	4688
	653.5	-91.1	4704
	651.2	-90.9	4719
	649	-90.1	4735
	646.8	-90.1	4750
	644.6	-90.2	4765
	642.1	-90.3	4781
	639.5	-89.5	4796
	637	-89.4	4812
	634.5	-88.9	4827
	632.3	-88.6	4843
	630.1	-88.5	4858
	627.6	-88.5	4874
	625.7	-88.1	4889
	624.4	-88	4904
	623.5	-88	4920
	622.2	-87.7	4935
	620.6	-86.9	4951
	618.8	-86.5	4966
	616.6	-86.2	4981
	614.7	-85.2	4997
	612.5	-83.6	5012
	610.3	-81.9	5028
	608.1	-79	5043
	605.9	-72.7	5059
	603.8	-67.2	5074
	601.3	-62	5090
	599.1	-53.1	5105
	596.3	-44.9	5120
	594.1	-36.6	5136
	591.6	-27.8	5151
	589.1	-19.6	5167
	587.3	-11.9	5182
	585.1	-5	5197
	583.3	1.3	5213
	580.8	8.5	5228
	578.6	18.9	5244
	576.1	29.4	5259
	573.7	42.7	5275
	571.2	56.7	5290
	568.8	66.4	5305
	566	71.3	5321
	563.2	73.1	5336
	560.8	73.3	5351
	558.3	74.1	5367
	555.8	73.7	5382
	553.4	73.9	5397
	550.6	73.4	5413
	548.2	73	5428
	545.4	73.2	5444
	542.7	73.1	5459
	540	73	5474
	536.9	72.8	5490
	533.9	72.8	5505
	529.6	72.4	5521
	525.7	72.4	5536
	522	72.5	5551
	518.4	72	5567
	515.1	72.1	5582
	511.8	72.1	5598
	508.7	71.8	5613
	506	71.9	5628
	503.3	71.9	5644
	500.6	71.8	5659
	497.9	71.4	5675
	495.2	71.5	5690
	492.5	71.6	5706
	489.8	71.6	5721
	487.1	71.4	5736
	484.4	71.4	5752
	481.7	71.6	5767
	479.1	71.2	5783
	476.7	71	5798
	474.3	71	5813
	472.5	70.9	5829
	470.4	70.5	5844
	468	71	5859
	466	70.5	5875
	463.9	70.5	5890
	462.1	70.4	5905
	460.3	70.3	5921
	458.8	70.5	5936
	457.4	70.5	5952
	455.9	70.4	5967
	454.1	70.3	5983
	452.3	70.1	5998
	450.9	70.1	6013
	449.1	70.1	6029
	447.3	69.9	6044
	445.2	69.9	6059
	443.2	70	6075
	440.8	69.9	6090
	439.1	69.6	6105
	437.3	70	6120
	435.2	69.7	6136
	433.5	69.9	6151
	431.7	69.6	6167
	430.2	69.5	6182
	428.8	69.2	6197
	427.3	69.4	6213
	425.6	69.2	6228
	423.5	69.3	6243
	421.5	69.1	6258
	419.7	69.3	6274
	418.5	69.1	6289
	417.4	69.3	6304
	416.2	69.1	6320
	415	68.9	6335
	413.9	69	6350
	412.7	68.9	6366
	411.2	68.9	6381
	410.1	68.6	6396
	409.2	68.7	6411
	408	68.9	6427
	406.3	68.7	6442
	404.8	68.6	6457
	403.1	68.5	6473
	401.3	68.4	6488
	399.9	68.4	6503
	398.4	68.4	6519
	396.7	68.1	6534
	395	68.2	6549
	393.5	68.3	6565
	391.8	68.1	6580
	390.3	68.3	6596
	388.6	67.9	6611
	386.9	67.8	6626
	385.1	67.9	6642
	383.4	67.6	6657
	381.9	67.6	6672
	380.5	67.6	6688
	379.1	67.8	6703
	377	67.5	6718
	375	67.7	6733
	373.3	67.3	6749
	371.6	67.3	6764
	370.1	67.3	6779
	368.7	67.2	6795
	367.3	67.1	6810
	365.5	67.3	6825
	363.5	67.4	6841
	361.8	67	6856
	360.4	67.2	6871
	358.9	66.7	6886
	357.2	66.8	6902
	355.8	67	6917
	354.4	66.4	6932
	352.9	66.8	6948
	351.8	66.9	6963
	350.6	66.8	6978
	349.5	66.7	6994
	348.4	66.3	7009
	346.9	66.3	7024
	345.2	66.4	7039
	343.5	66.3	7055
	341.8	66	7070
	339.8	65.8	7085
	338.1	66.2	7100
	335.8	66.3	7116
	333.6	65.8	7131
	331.6	66	7146
	329.6	65.7	7162
	327.9	65.6	7177
	325.9	65.7	7192
	323.9	65.6	7207
	322.2	65.5	7223
	320.5	65.3	7238
	318.5	65.5	7253
	316.6	65.4	7268
	314.6	65.1	7284
	312.3	65.2	7299
	310.4	64.9	7314
	308.1	65	7329
	306.4	64.8	7345
	304.4	64.5	7360
	302.2	64.9	7375
	300.2	64.5	7390
	298.3	64.7	7406
	296	64.4	7421
	293.8	64.4	7436
	291.5	64.2	7451
	289	64.1	7467
	286.5	64.2	7482
	283.7	63.8	7497
	281.2	63.8	7512
	278.4	64.2	7528
	275.9	63.6	7543
	273.4	63.4	7558
	271.2	62.9	7573
	268.6	63	7588
	266.1	62.9	7604
	263.6	62.9	7619
	260.9	62.8	7634
	257.8	62.7	7649
	255.1	62.5	7664
	252.3	62.1	7680
	249.8	62.2	7695
	247.6	62	7710
	245.4	62.1	7725
	242.9	61.8	7740
	240.4	61.7	7756
	237.7	61.5	7771
	235.5	61.4	7786
	232.7	61.3	7801
	230.5	61.1	7816
	228	60.8	7832
	225.8	60.7	7847
	223.4	60.4	7862
	220.9	60.3	7877
	218.4	60.2	7893
	216	59.9	7908
	213.5	59.8	7923
	211.3	59.7	7938
	208.9	59.8	7953
	206.4	59.7	7969
	204	59.2	7984
	201.5	59.1	7999
	199.1	58.8	8014
	196.6	58.6	8029
	194.2	58.6	8044
	191.7	58.7	8060
	189.3	58.3	8075
	187.1	58	8090
	184.7	58.1	8105
	182.3	57.9	8120
	179.8	57.6	8136
	177.1	57.5	8151
	175	57.6	8166
	172.5	57.3	8181
	170.1	57.2	8196
	167.7	57.1	8211
	165.3	57	8227
	162.6	56.9	8242
	160.2	56.9	8257
	157.7	57	8272
	155.3	56.6	8287
	153.2	56.7	8302
	151	56.8	8317
	148.9	56.6	8332
	146.7	56.7	8348
	144.9	56.4	8363
	142.7	56.6	8378
	140.6	56.6	8393
	138.2	56.7	8408
	136.1	56.8	8423
	133.9	56.7	8438
	131.8	57	8453
	129.7	56.9	8468
	127.3	56.8	8484
	125.2	56.9	8499
	122.8	57.2	8514
	120.4	57.1	8529
	118.2	57.2	8544
	116.1	57	8559
	113.7	57.1	8574
	111.6	57.2	8589
	109.5	57.4	8604
	107.4	57.4	8619
	105.5	57.3	8634
	103.4	57.4	8649
	101.6	57.3	8664
	99.5	57.7	8679
	97.4	57.3	8694
	95.5	57.6	8709
	93.4	57.5	8724
	91.3	57.7	8739
	89.5	57.7	8754
	87.4	57.9	8770
	85.5	57.9	8785
	83.7	57.9	8800
	81.6	57.9	8815
	79.8	58	8830
	77.9	58	8845

## Sheet: AL038
Thermomagnetic results
Sample	TEMP	TSUSC	TIME
AL038	(°C)	(°C)	(s)
	22.1	-3.3	0
	22.3	0.7	16
	23.6	-2.7	31
	25.4	-2.5	46
	27.7	-2.3	62
	30.1	-2.3	77
	32.1	-2.3	92
	34.2	-2.1	107
	36.3	-2.1	122
	38.3	-1.9	137
	40.2	-1.8	153
	42	-1.8	168
	43.8	-1.6	183
	45.6	-1.5	198
	47.2	-1.5	213
	48.7	-1.4	228
	50.5	-1.5	243
	52.1	-1.2	259
	53.7	-1.2	274
	55.2	-1.2	289
	56.8	-0.9	304
	58.3	-0.8	319
	59.9	-1	335
	61.5	-0.9	350
	63	-0.5	365
	64.9	-0.6	380
	66.4	-0.4	395
	68	-0.3	410
	69.6	-0.1	425
	71.1	-0.1	441
	72.9	0.1	456
	74.5	0.2	471
	76.4	0.2	486
	78.2	0.4	501
	79.8	0.6	516
	81.6	0.7	532
	83.4	0.8	547
	85.3	1	562
	87.1	0.9	577
	88.9	1.2	592
	90.8	1.2	607
	92.9	1.3	623
	95	1.7	638
	97.4	1.8	653
	99.5	1.7	668
	101.6	1.8	683
	103.7	2.2	698
	106.1	2.1	714
	108.2	2.3	729
	110.6	2.4	744
	112.7	2.7	759
	114.8	2.8	774
	116.9	3.2	790
	119	3.1	805
	120.9	3.4	820
	123	3.5	835
	124.9	3.5	851
	126.7	3.7	866
	128.9	3.8	881
	130.7	3.9	896
	132.9	4	912
	135	4.1	927
	136.9	4.2	942
	139	4.5	957
	141.1	4.5	972
	143.3	4.6	987
	145.4	4.8	1003
	147.6	4.8	1018
	149.7	5	1033
	152.1	5.2	1048
	154.2	5.3	1063
	156.7	5.6	1079
	158.8	5.7	1094
	161.2	5.7	1109
	163.4	5.7	1124
	165.5	5.9	1139
	167.7	6	1155
	169.8	6.2	1170
	172.3	6.3	1185
	174.7	6.5	1200
	176.9	6.7	1215
	179	6.8	1230
	181.4	6.8	1246
	183.9	7	1261
	186.3	7.3	1276
	188.5	7.6	1291
	190.7	7.9	1307
	193.1	8	1322
	195.3	8.2	1337
	197.4	8.4	1352
	199.6	8.3	1367
	202.1	8.7	1383
	204.2	8.8	1398
	206.4	9	1413
	208.3	9.1	1428
	210.2	9.4	1444
	212.2	9.7	1459
	214.3	9.7	1474
	216.5	10	1489
	219	10.3	1504
	221.5	10.5	1520
	224.2	10.6	1535
	226.9	11	1550
	229.7	11.1	1565
	232.4	11.3	1581
	234.9	11.5	1596
	237.1	11.9	1611
	239.6	11.9	1626
	242.1	12.1	1642
	244.3	12.4	1657
	246.8	12.4	1672
	249.2	12.6	1687
	251.7	12.8	1703
	253.9	13.1	1718
	256.2	13.1	1733
	258.4	13.2	1748
	260.9	13.5	1763
	263.4	13.5	1779
	265.6	13.7	1794
	268.1	13.6	1809
	270.6	13.8	1824
	273.1	13.9	1840
	275.3	13.9	1855
	277.6	13.7	1870
	279.8	14	1885
	282	13.8	1901
	284.5	14.1	1916
	286.8	13.7	1931
	289	13.8	1946
	291.3	13.6	1961
	293.8	13.5	1977
	296	13.6	1992
	298.8	13.4	2007
	301.6	13.3	2023
	304.4	13.1	2038
	307	13	2053
	309.5	12.8	2068
	312.1	12.5	2084
	314.6	12.5	2099
	317.1	12.4	2114
	320	12.3	2130
	322.5	11.8	2145
	325.1	11.6	2160
	327.6	11	2176
	330.4	10.7	2191
	332.7	10.2	2206
	335.5	9.9	2221
	338.1	9.4	2237
	340.7	8.7	2252
	342.9	8.2	2267
	345.2	7.7	2283
	347.5	7.1	2298
	349.5	6.7	2314
	351.5	5.9	2329
	353.8	5.1	2344
	356.1	4.5	2359
	358.4	4	2375
	360.7	3	2390
	362.7	2.4	2405
	365.3	1.7	2420
	367.3	0.9	2436
	369.8	0.1	2451
	372.4	-0.5	2466
	374.7	-1.1	2482
	377.6	-2	2497
	379.9	-2.6	2512
	382.5	-3.4	2528
	384.8	-3.8	2543
	387.4	-4.4	2558
	390.3	-5	2573
	392.9	-5.6	2589
	395.3	-5.8	2604
	397.9	-6.5	2620
	400.5	-6.8	2635
	402.8	-7.3	2650
	405.4	-7.7	2665
	408	-8.1	2681
	410.7	-8.8	2696
	413.3	-8.9	2711
	415.9	-9.5	2727
	418.8	-9.6	2742
	421.5	-10.2	2757
	424.4	-10.6	2773
	427	-10.8	2788
	430	-11.1	2803
	432.3	-11.6	2819
	434.6	-12.1	2834
	437	-12.5	2849
	439.4	-12.8	2865
	442	-13	2880
	444.7	-13.6	2896
	447.3	-13.9	2911
	450	-14.1	2926
	452.6	-14.6	2942
	455	-14.6	2957
	458	-15	2972
	460.6	-15.5	2987
	463.6	-15.7	3003
	466.9	-15.9	3018
	469.8	-16.3	3034
	473.1	-16.4	3049
	475.8	-16.6	3064
	478.8	-17.2	3080
	481.4	-16.7	3095
	484.1	-17	3110
	486.8	-17.1	3126
	489.2	-17.1	3141
	491.9	-17	3157
	494.3	-17	3172
	497	-17.2	3188
	499.7	-16.9	3203
	502.7	-16.6	3218
	505.4	-16.7	3234
	508.4	-16.4	3249
	511.5	-16.1	3265
	513.9	-16	3280
	516.6	-15.7	3295
	519	-15.3	3311
	521.7	-14.8	3326
	524.2	-15.1	3342
	526.6	-14.1	3357
	529.6	-13.5	3372
	532.4	-13	3388
	535.1	-12.1	3403
	537.8	-11.7	3419
	540.9	-10.7	3434
	543.6	-10.2	3449
	546.4	-9	3465
	549.4	-7.5	3480
	552.8	-6.3	3496
	556.2	-4.8	3511
	559.2	-3.3	3526
	562.3	-2	3542
	565.4	-4.6	3557
	568.8	-10.7	3573
	572.1	-21.5	3588
	575.2	-35.4	3603
	578	-46.5	3619
	581.1	-55.3	3634
	583.9	-63.1	3649
	586.7	-71	3665
	589.5	-79.2	3680
	592.6	-87	3696
	596	-94.8	3711
	598.8	-100.7	3727
	601.9	-105.6	3742
	604.7	-108.6	3757
	607.5	-110.5	3773
	610	-112.4	3788
	612.8	-113.3	3804
	615.3	-114.1	3819
	618.1	-115.2	3834
	621.3	-116.9	3850
	624.7	-118.2	3865
	627.6	-119.1	3881
	630.7	-119.7	3896
	634.2	-121.3	3912
	638	-121.9	3927
	642.1	-122.7	3943
	645.5	-123.9	3958
	648.4	-124.1	3974
	651.2	-125.4	3989
	654.4	-125.7	4004
	657.6	-126.2	4020
	660.8	-126.5	4035
	664.3	-127.5	4051
	667.8	-127.5	4066
	671.3	-128.5	4082
	674.8	-129.5	4097
	678.7	-130.1	4113
	682.2	-130.4	4128
	685.1	-130.6	4143
	688	-131.2	4159
	691.2	-131.4	4174
	694.4	-131.8	4190
	697.6	-132.3	4205
	700.9	-132.7	4220
	704.4	-133	4236
	706.7	-133.2	4251
	708.3	-133.1	4267
	709	-133.8	4282
	709	-133.4	4298
	708	-133.2	4313
	705.1	-132.8	4328
	702.2	-132.9	4344
	699.6	-132.2	4359
	696.7	-132.4	4375
	694.1	-131.9	4390
	691.5	-131.5	4406
	689.6	-131.3	4421
	687.7	-131	4437
	686.4	-130.8	4452
	685.4	-130.7	4467
	684.1	-130.6	4483
	682.8	-130.2	4498
	680.9	-129.7	4514
	679	-129.5	4529
	676.7	-128.7	4545
	674.5	-128.5	4560
	672.6	-128.2	4575
	670.7	-128	4591
	668.8	-127.6	4606
	666.5	-127.3	4622
	664.3	-126.9	4637
	661.7	-126.6	4653
	659.2	-126.1	4668
	656.6	-125.3	4684
	654.4	-124.8	4699
	651.9	-124.3	4714
	649.3	-124.1	4730
	646.5	-123.7	4745
	644.3	-122.8	4761
	641.7	-121.9	4776
	639.2	-119.9	4792
	636.7	-117.2	4807
	633.9	-113.7	4823
	631	-111.4	4838
	628.5	-108.8	4853
	626.3	-107.4	4869
	623.8	-105.5	4884
	621.3	-103.8	4900
	619.1	-102.4	4915
	617.2	-100.1	4931
	615	-98.4	4946
	613.4	-97.3	4961
	611.9	-95.8	4977
	610	-93.8	4992
	607.8	-90.7	5008
	605.3	-87.7	5023
	603.1	-84.4	5039
	601.3	-81.9	5054
	599.7	-79.2	5069
	598.2	-77	5085
	596.3	-73.8	5100
	594.4	-69.9	5116
	591.9	-66.5	5131
	589.8	-62.3	5146
	587.6	-58.2	5162
	585.1	-54.6	5177
	582.6	-51.4	5193
	580.2	-48.4	5208
	577.4	-44.6	5224
	574.6	-39.1	5239
	571.8	-33.6	5254
	569.4	-27.6	5270
	566.6	-22.2	5285
	564.1	-17.8	5301
	561.1	-15.5	5316
	558	-14.7	5332
	554.6	-13.9	5347
	551.3	-13.3	5363
	548.2	-12.8	5378
	545.4	-12.7	5393
	542.7	-12.1	5409
	540.3	-11.4	5424
	538.1	-11.2	5439
	535.7	-10.5	5455
	533.6	-10.1	5470
	531.1	-9.4	5486
	528.7	-8.8	5501
	526	-8.3	5516
	522.9	-7.4	5532
	520.2	-6.7	5547
	517.2	-6.1	5563
	514.8	-5.3	5578
	512.7	-4.8	5594
	510.9	-4.3	5609
	508.7	-3.5	5624
	506.3	-3.1	5640
	504.5	-2.6	5655
	502.4	-1.8	5670
	500.6	-1.7	5686
	498.8	-0.9	5701
	496.7	-0.5	5717
	494.3	0.2	5732
	491.9	0.7	5747
	489.2	1.7	5763
	486.2	2.2	5778
	483.2	2.7	5793
	480	3.4	5809
	477	4.1	5824
	474.3	4.3	5840
	471.9	4.9	5855
	469.8	5	5870
	467.7	5.1	5886
	466	5.6	5901
	464.2	5.7	5916
	462.1	6.4	5932
	460.3	6.3	5947
	458.2	6.5	5963
	456.5	6.7	5978
	454.7	6.7	5993
	452.9	7	6009
	451.1	7.3	6024
	449.4	7.3	6039
	448.2	7.6	6055
	446.7	7.6	6070
	445.5	7.8	6085
	443.8	7.8	6101
	442.6	7.8	6116
	441.1	8	6132
	439.6	8	6147
	437.9	8	6162
	436.4	8.3	6177
	434.9	8	6193
	433.2	8	6208
	432	8.2	6223
	430.5	8.2	6239
	429.4	8.2	6254
	427.9	8.2	6269
	426.1	8.1	6285
	424.7	8.6	6300
	423.2	8.3	6316
	422	8.3	6331
	420.9	8.2	6346
	419.4	8.4	6361
	417.7	8.4	6377
	416.2	8.1	6392
	414.7	8	6408
	413.6	8.2	6423
	412.7	8.2	6438
	411.5	8.2	6453
	410.4	8.2	6469
	409.2	8.2	6484
	407.5	8.1	6500
	406.3	8.4	6515
	405.1	8	6530
	404.3	8.1	6546
	403.4	8.1	6561
	402.8	8	6576
	401.9	7.9	6591
	400.8	8	6606
	399	7.9	6622
	397.9	7.6	6637
	396.4	7.8	6652
	395.5	7.8	6668
	394.4	7.7	6683
	393.5	7.7	6698
	392.6	7.9	6714
	391.8	7.6	6729
	390.9	7.5	6744
	389.5	7.3	6760
	388	7.5	6775
	386.6	7.4	6790
	384.8	7.4	6805
	383.4	7.2	6821
	382.2	7.1	6836
	380.5	7	6851
	379.1	6.9	6867
	377.3	6.9	6882
	375.9	6.8	6897
	374.4	6.8	6912
	373	6.6	6928
	371.9	6.7	6943
	370.7	6.5	6958
	369.6	6.6	6974
	368.4	6.4	6989
	367.5	6.4	7004
	366.4	6.4	7019
	365.3	6.2	7034
	364.1	6.2	7050
	363	6.3	7065
	361.2	5.9	7080
	359.2	5.9	7096
	357.5	5.8	7111
	355.5	5.8	7126
	353.2	5.8	7142
	351.2	5.4	7157
	349.2	5.4	7172
	347.2	5.3	7187
	345.2	4.9	7203
	343.2	5.1	7218
	341.5	4.7	7233
	339.8	4.7	7248
	338.7	4.6	7264
	337.3	4.6	7279
	336.1	4.5	7294
	335	4.4	7309
	333.6	4.4	7325
	331.9	4.2	7340
	330.2	3.8	7355
	328.5	4	7370
	327	3.8	7386
	325.9	3.9	7401
	324.8	3.8	7416
	323.4	3.5	7431
	322.2	3.5	7447
	320.8	3.4	7462
	319.7	3.3	7477
	318.5	3.2	7492
	317.4	3	7508
	316.3	3.2	7523
	315.4	2.9	7538
	314.3	3.1	7554
	313.5	2.9	7569
	312.9	3.1	7584
	311.8	2.7	7599
	310.9	2.7	7614
	309.8	2.7	7630
	308.7	2.8	7645
	307.5	2.5	7660
	306.1	2.4	7675
	304.7	2.3	7690
	303.6	2.5	7706
	302.5	2.4	7721
	301.4	2.1	7736
	300.5	1.9	7751
	299.7	2	7767
	299.1	1.7	7782
	298	2	7797
	296.6	2	7812
	295.2	1.5	7828
	294.1	1.7	7843
	292.7	1.2	7858
	291.5	1.5	7873
	290.1	1.3	7889
	288.5	1	7904
	287.1	1.3	7919
	285.7	1.1	7934
	284.5	1.1	7949
	283.4	0.8	7964
	282	0.9	7980
	280.9	0.4	7995
	279.5	0.4	8010
	277.8	0.3	8025
	276.2	0.2	8041
	274.2	0.1	8056
	272.5	0	8071
	270.6	0	8086
	268.4	-0.1	8101
	265.9	-0.5	8117
	263.6	-0.6	8132
	261.1	-0.7	8147
	258.4	-0.7	8162
	255.6	-0.9	8177
	253.1	-1.2	8193
	250.6	-1.3	8208
	248.4	-1.7	8223
	245.9	-1.7	8238
	243.4	-2	8253
	241	-2.1	8269
	238.8	-2.2	8284
	236.6	-2.4	8299
	234.6	-2.8	8314
	232.4	-2.5	8329
	230.2	-2.6	8344
	228	-2.8	8360
	225.8	-3.2	8375
	223.6	-3.7	8390
	221.2	-3.4	8405
	219.3	-3.6	8420
	217.1	-3.9	8435
	214.9	-4	8451
	212.7	-4.3	8466
	210.5	-4.4	8481
	208.1	-4.8	8496
	205.9	-5.1	8511
	203.4	-5.3	8526
	201.3	-5.5	8541
	198.8	-5.7	8557
	196.6	-6	8572
	194.2	-6.1	8587
	191.5	-6.4	8602
	189	-6.7	8617
	186.3	-7	8632
	183.9	-7.2	8647
	181.4	-7.5	8662
	179	-7.5	8677
	176.6	-7.8	8692
	173.9	-8	8707
	170.9	-8.3	8723
	168.2	-8.4	8738
	165.5	-8.6	8753
	163.1	-8.7	8768
	160.7	-8.9	8783
	158.3	-9.1	8798
	155.9	-9.2	8813
	153.7	-9.4	8828
	151.6	-9.4	8843
	149.7	-9.5	8858
	147.6	-9.8	8873

## Sheet: AL045
Thermomagnetic results
Sample	TEMP	TSUSC	TIME
AL045	(°C)	(°C)	(s)
	20.5	-60.7	0
	21	-121.9	17
	22.9	-121.8	32
	25.2	-121.7	47
	27.5	-121.9	62
	29.8	-122.1	77
	32.1	-122.1	92
	34.2	-122	107
	36.3	-122.3	122
	38.1	-122.1	137
	39.9	-122.3	152
	41.7	-122.3	167
	43.5	-122.6	182
	45.3	-122.5	198
	47.2	-122.5	213
	48.7	-122.5	228
	50.5	-122.5	243
	52.1	-122.7	258
	53.9	-122.6	273
	55.5	-122.8	288
	57	-122.9	303
	58.9	-122.9	319
	60.4	-123	333
	62.2	-123.1	349
	63.8	-123.3	364
	65.6	-123.3	379
	67.2	-123.3	394
	68.8	-123.5	409
	70.6	-123.5	424
	72.4	-123.8	439
	74	-123.7	454
	75.8	-123.9	470
	77.7	-124	485
	79.5	-124	500
	81.1	-124.1	515
	82.9	-124.4	530
	84.7	-124.4	545
	86.6	-124.6	560
	88.4	-124.6	575
	90.3	-125	591
	92.4	-125	606
	94.2	-125.2	621
	96.3	-125.3	636
	98.4	-125.5	651
	100.5	-125.6	666
	102.6	-125.8	681
	104.8	-125.8	697
	106.9	-126.1	712
	109.2	-126.2	727
	111.6	-126.3	742
	113.7	-126.2	757
	115.6	-126.3	772
	117.7	-126.4	788
	119.6	-126.3	803
	121.7	-126.4	818
	123.8	-126.5	833
	125.9	-126.5	848
	127.8	-126.7	863
	129.9	-126.6	878
	132.1	-126.7	893
	134.2	-126.8	909
	136.3	-126.8	924
	138.5	-126.9	939
	140.6	-126.8	954
	143	-127	969
	145.1	-126.8	985
	147.3	-126.8	1000
	149.7	-126.9	1015
	151.6	-126.9	1030
	154	-126.9	1045
	156.1	-127	1060
	158.5	-126.9	1076
	161	-126.8	1091
	163.4	-127	1106
	165.5	-126.9	1121
	167.7	-127	1136
	169.8	-127	1152
	172	-127.1	1167
	174.7	-127	1182
	176.9	-127	1197
	179.3	-127.1	1212
	181.4	-127	1227
	183.9	-126.9	1243
	186	-126.9	1258
	188.2	-127	1273
	190.4	-126.9	1288
	192.6	-127.1	1304
	195	-127	1319
	197.7	-127	1334
	200.4	-126.8	1349
	203.2	-127	1364
	205.6	-127	1379
	208.1	-127.2	1394
	210.2	-127	1409
	212.7	-127	1424
	215.2	-126.9	1440
	217.6	-127	1455
	219.8	-127.2	1470
	222.3	-127.1	1485
	224.5	-126.9	1501
	226.9	-127	1516
	229.4	-127.1	1531
	232.2	-127.1	1546
	234.9	-127.1	1561
	237.9	-127.1	1576
	240.7	-127	1592
	243.2	-127	1607
	245.7	-127.2	1622
	248.1	-127.1	1637
	250.6	-127.3	1652
	253.1	-127	1667
	255.9	-127.2	1683
	258.4	-127.2	1698
	260.9	-127.1	1713
	263.4	-127.3	1728
	265.6	-127.2	1744
	268.1	-127.2	1759
	270.6	-127	1774
	273.1	-126.9	1789
	275.3	-126.9	1804
	278.1	-127.1	1820
	280.6	-127.2	1835
	282.9	-127.2	1850
	285.4	-127.2	1865
	288.2	-127.1	1881
	290.7	-127.3	1896
	293.2	-127.3	1911
	295.7	-127.2	1927
	298	-127.1	1942
	300.8	-127.4	1957
	303.3	-127.3	1972
	306.1	-127.5	1988
	309	-127.3	2003
	311.5	-127.5	2018
	314	-127.1	2033
	316.6	-127.3	2048
	319.1	-127.5	2064
	321.7	-127.6	2079
	324.5	-127.5	2094
	327	-127.4	2109
	329.9	-127.6	2125
	332.4	-127.7	2140
	335	-127.6	2155
	337.3	-127.6	2171
	339.5	-127.4	2186
	341.5	-127.4	2201
	343.5	-127.7	2216
	345.8	-127.5	2231
	348.1	-127.9	2246
	350.4	-127.6	2262
	352.6	-127.5	2277
	355.2	-127.8	2292
	357.5	-127.6	2307
	359.8	-128	2323
	362.1	-128.2	2338
	364.4	-127.9	2353
	366.7	-127.7	2368
	369.3	-128	2384
	371.9	-128.1	2399
	374.2	-128.1	2414
	376.8	-128.2	2429
	379.3	-128.1	2445
	382.2	-128.3	2460
	384.8	-128.3	2475
	387.4	-128.3	2491
	390	-128.3	2506
	392.6	-128.3	2521
	395.5	-128.1	2536
	397.9	-128.5	2552
	400.5	-128.6	2567
	402.8	-128.5	2582
	405.7	-128.7	2598
	408.3	-128.8	2613
	411.2	-128.9	2628
	414.2	-128.7	2643
	416.8	-128.8	2659
	419.4	-128.9	2674
	421.8	-128.9	2689
	424.4	-128.8	2704
	427	-128.8	2720
	429.7	-128.8	2735
	432.6	-128.9	2750
	435.5	-129.3	2766
	438.2	-129	2781
	441.1	-129.3	2796
	443.8	-129.1	2812
	446.7	-129.1	2827
	449.4	-129.5	2842
	452	-129.3	2857
	454.7	-129.2	2873
	457.4	-129.2	2888
	460	-129.5	2903
	462.7	-129.6	2919
	465.4	-129.4	2934
	468.3	-129.7	2949
	471	-129.5	2965
	473.4	-129.4	2980
	475.8	-129.5	2995
	478.5	-129.6	3010
	481.1	-129.7	3026
	483.8	-129.6	3041
	486.8	-129.6	3056
	489.8	-129.8	3072
	492.8	-130.1	3087
	495.5	-130.1	3102
	498.2	-130.1	3118
	500.9	-129.9	3133
	503	-130.2	3148
	505.7	-130.1	3164
	508.4	-130	3179
	510.9	-130.1	3194
	513.3	-130.3	3210
	516.3	-130.5	3225
	519	-130.6	3240
	522	-130.5	3256
	524.8	-130.4	3271
	527.5	-130.5	3286
	530.5	-130.5	3302
	533.3	-130.8	3317
	536	-130.7	3332
	539	-130.7	3348
	542.1	-130.7	3363
	544.5	-130.7	3378
	547.6	-130.9	3394
	550.3	-131	3409
	553.1	-131	3424
	555.8	-131.2	3439
	558.6	-131	3455
	561.4	-131.2	3470
	564.1	-131.2	3485
	567.2	-131.3	3501
	570.3	-131.8	3516
	573.7	-131.8	3531
	576.8	-132.3	3547
	579.9	-133	3562
	582.9	-133.5	3578
	586	-133.5	3593
	588.8	-133.7	3609
	591.6	-134.1	3624
	594.7	-134.6	3639
	597.5	-134.8	3655
	600.6	-135.1	3670
	603.8	-135.3	3685
	606.6	-135.2	3701
	609.4	-135.8	3716
	612.2	-135.8	3731
	614.7	-135.6	3747
	617.8	-135.6	3762
	620.3	-136	3778
	623.5	-136.1	3793
	626.3	-136.1	3808
	629.8	-135.9	3824
	632.9	-136.3	3839
	636.4	-136.2	3854
	639.9	-136.2	3870
	643	-136.3	3885
	646.2	-136.5	3900
	649	-136.5	3916
	652.2	-136.5	3931
	655.4	-136.6	3947
	658.6	-136.9	3962
	662.1	-137.1	3977
	665.2	-136.9	3993
	668.4	-136.6	4008
	671.3	-137.1	4024
	674.5	-137.3	4039
	677.7	-137.6	4054
	680.6	-137.1	4070
	683.5	-137.4	4085
	687	-137.4	4101
	690.2	-137.7	4116
	693.4	-137.7	4132
	696.7	-137.6	4147
	699.6	-137.8	4162
	702.5	-137.7	4178
	704.8	-138	4193
	706.4	-137.6	4209
	707.3	-137.9	4224
	707.7	-138.1	4239
	707	-137.5	4255
	706.4	-137.5	4270
	704.8	-137.7	4286
	702.8	-137.9	4301
	700.9	-137.8	4316
	698.6	-137.8	4332
	696.7	-137.4	4347
	694.4	-137.7	4363
	692.5	-137.6	4378
	690.5	-137.5	4393
	688.3	-137.4	4409
	686	-137.2	4424
	684.1	-137.3	4440
	681.9	-137.2	4455
	679.3	-137.2	4470
	676.7	-137	4486
	673.2	-136.6	4501
	669.4	-136.8	4517
	666.2	-137	4532
	663.3	-137.1	4548
	660.5	-136.8	4563
	657.9	-136.8	4579
	655.4	-136.5	4594
	652.8	-136.6	4609
	650	-136.5	4625
	647.8	-136.4	4640
	644.9	-136.5	4655
	642.4	-136.3	4671
	639.5	-136.3	4686
	637	-136.4	4702
	634.8	-136.3	4717
	632.6	-136.3	4732
	630.1	-136.2	4748
	627.2	-136.2	4763
	624.7	-136.3	4779
	621.6	-136	4794
	619.1	-136.1	4810
	616.6	-136	4825
	613.8	-135.9	4840
	611.3	-135.8	4856
	608.8	-135.9	4871
	606.3	-135.6	4886
	603.8	-135.5	4902
	601.3	-135.5	4917
	598.8	-135.3	4932
	596.3	-135	4948
	593.8	-134.9	4963
	591.3	-134.8	4978
	588.8	-134.3	4994
	586.4	-134.6	5009
	583.6	-134.2	5025
	581.1	-134.2	5040
	578.3	-133.4	5055
	575.8	-133.4	5071
	573.4	-133.2	5086
	570.6	-133	5101
	568.1	-132.5	5117
	565.7	-132.2	5132
	563.2	-132.1	5147
	560.5	-132.3	5163
	558	-132.3	5178
	555.5	-132.1	5193
	553.1	-132.1	5209
	551	-132.1	5224
	548.2	-132	5240
	545.8	-131.9	5255
	543	-131.9	5270
	540.6	-132.1	5286
	538.1	-131.8	5301
	535.7	-132	5317
	533.3	-132	5332
	530.8	-131.7	5347
	528.4	-131.4	5363
	525.4	-131.4	5378
	522.6	-131.4	5393
	519.6	-131.7	5409
	517.2	-131.5	5424
	514.8	-131.7	5439
	512.1	-131.4	5455
	509.6	-131.2	5470
	507.2	-131.2	5485
	504.8	-131.3	5501
	502.7	-131.1	5516
	500.9	-131.2	5531
	498.8	-131.1	5547
	497	-131.2	5562
	495.2	-130.9	5578
	493.7	-131.1	5593
	491.9	-131.1	5608
	490.4	-131	5623
	488.6	-131.1	5639
	487.1	-131	5654
	485.3	-131	5670
	483.8	-131.2	5685
	482.3	-130.9	5700
	480.5	-131	5716
	479.1	-131.1	5731
	477.6	-131	5746
	476.1	-131	5762
	474.6	-130.9	5777
	472.8	-130.9	5792
	470.7	-130.8	5808
	468.6	-130.5	5823
	466.3	-131	5838
	463.9	-130.8	5854
	462.1	-130.6	5869
	460.3	-130.7	5884
	458.5	-130.7	5900
	457.4	-130.6	5915
	455.9	-130.8	5931
	454.7	-130.5	5946
	453.8	-130.5	5961
	452.9	-130.8	5977
	451.7	-130.6	5992
	450.3	-130.7	6007
	448.8	-130.7	6023
	447.3	-130.4	6038
	445.8	-130.6	6053
	444.4	-130.7	6068
	443.5	-130.5	6084
	442.3	-130.2	6099
	440.8	-130.5	6114
	439.4	-130.6	6130
	437.9	-130.3	6145
	436.7	-130.5	6160
	435.2	-130.3	6175
	434.1	-130.3	6191
	432.6	-130.6	6206
	431.4	-130.2	6221
	430.5	-130.2	6236
	429.4	-130.2	6252
	428.2	-130.2	6267
	426.7	-130.3	6282
	425.3	-130.1	6297
	423.2	-130.4	6313
	421.5	-130	6328
	419.4	-130.1	6343
	417.7	-130	6359
	415.6	-130.3	6374
	413.9	-130.1	6389
	412.1	-130.1	6405
	410.4	-130.1	6420
	408.9	-130	6435
	407.5	-130	6450
	406	-130	6466
	404.5	-130.1	6481
	403.1	-129.9	6496
	401.6	-130	6512
	400.2	-129.9	6527
	399	-129.8	6543
	397.6	-130	6558
	396.1	-129.8	6573
	394.7	-129.9	6588
	393.5	-129.8	6603
	392.4	-129.9	6619
	391.2	-129.7	6634
	390	-129.7	6649
	389.2	-129.8	6665
	388.3	-129.9	6680
	387.4	-129.6	6695
	386	-130	6710
	384.5	-129.9	6726
	383.1	-129.7	6741
	381.4	-129.7	6756
	379.9	-129.8	6772
	378.2	-129.6	6787
	376.5	-129.7	6802
	374.7	-129.8	6818
	373	-129.7	6833
	371	-129.7	6848
	369.3	-129.5	6863
	367.8	-129.6	6878
	366.1	-129.8	6894
	364.4	-129.5	6909
	363	-129.6	6924
	361.2	-129.5	6940
	360.1	-129.5	6955
	359.2	-129.3	6970
	358.1	-129.4	6985
	356.9	-129.5	7001
	356.1	-129.3	7016
	354.9	-129.5	7031
	353.5	-129.5	7047
	352.1	-129.6	7062
	350.6	-129.4	7077
	348.9	-129.2	7092
	347.5	-129.2	7108
	345.8	-129.3	7123
	344.4	-129.2	7138
	342.7	-129.3	7154
	341	-129.3	7169
	339.2	-129	7184
	337.5	-129.2	7199
	336.4	-129.1	7214
	335	-129.2	7229
	333.6	-129	7245
	331.9	-129	7260
	330.4	-129.1	7275
	328.5	-129.2	7290
	326.8	-128.9	7306
	325.1	-129	7321
	323.4	-129.1	7336
	321.9	-128.9	7351
	320.5	-128.8	7367
	319.4	-129	7382
	318.5	-129	7397
	317.4	-129	7412
	316.3	-129	7427
	315.2	-128.8	7443
	313.7	-128.8	7458
	312.3	-128.9	7473
	310.9	-128.7	7488
	309.2	-128.9	7503
	307.8	-128.9	7519
	306.4	-128.9	7534
	304.7	-128.9	7549
	303.3	-128.8	7564
	301.4	-128.9	7579
	299.4	-128.8	7595
	297.4	-128.8	7610
	295.2	-128.5	7625
	292.9	-128.7	7640
	290.4	-128.4	7655
	287.9	-128.8	7671
	285.1	-128.5	7686
	282.6	-128.5	7701
	280.1	-128.5	7716
	277.6	-128.4	7732
	275	-128.6	7747
	272.8	-128.5	7762
	270.3	-128.3	7777
	267.5	-128.3	7792
	265	-128.4	7808
	262.3	-128.1	7823
	259.5	-128.4	7838
	257	-128.2	7853
	254.2	-128.4	7869
	251.7	-128.1	7884
	249.2	-128.1	7899
	247	-128.2	7914
	244.8	-128	7929
	242.3	-128.3	7945
	239.9	-128	7960
	237.4	-128	7975
	234.9	-127.9	7990
	232.7	-127.8	8005
	230.2	-127.7	8020
	227.8	-127.8	8035
	225.6	-127.7	8051
	223.1	-127.5	8066
	220.6	-127.8	8081
	218.2	-127.6	8096
	216	-127.5	8111
	213.8	-127.5	8127
	211.3	-127.2	8142
	208.9	-127.4	8157
	206.7	-127.2	8172
	204.2	-127.4	8187
	201.8	-127.2	8202
	199.3	-127.1	8218
	197.2	-127.2	8233
	194.7	-127.1	8248
	192.3	-127	8263
	189.8	-126.9	8278
	187.7	-126.9	8293
	185.2	-126.9	8309
	182.8	-127.1	8324
	180.6	-127.2	8339
	178.2	-127	8354
	175.8	-127	8369
	173.6	-127	8384
	171.2	-127.1	8399
	168.8	-126.9	8415
	166.3	-126.8	8430
	163.9	-126.7	8445
	161.5	-126.9	8460
	159.3	-126.8	8475
	156.9	-126.8	8490
	155.1	-126.8	8505
	152.9	-126.8	8520
	151	-126.9	8535
	148.9	-126.6	8550
	147	-126.6	8565
	144.9	-126.6	8581
	142.7	-126.6	8596
	140.6	-126.4	8611
	138.5	-126.5	8626
	136.3	-126.4	8641
	134.2	-126.4	8656
	131.8	-126.5	8671
	129.7	-126.4	8686
	127.3	-126.4	8701
	125.2	-126.4	8716
	123	-126.1	8731
	120.9	-126.4	8746

## Sheet: AL048
Thermomagnetic results
Sample	TEMP	TSUSC	TIME
AL048	(°C)	(°C)	(s)
	12	206.7	0
	12.3	203.8	16
	13.8	203.7	31
	15.9	203.9	46
	18.5	203.9	61
	21	204	76
	23.6	204.2	91
	25.7	204.3	106
	28	204.4	120
	30.3	204.7	136
	32.4	204.9	150
	34.5	205	165
	36.5	205.2	180
	38.3	205.3	195
	40.4	205.4	210
	42.2	205.5	225
	44	205.8	240
	45.6	206	255
	47.4	206.1	270
	49.2	206.3	285
	51.1	206.5	300
	52.9	206.7	315
	54.7	206.8	330
	56.5	207	345
	58.1	207.3	360
	59.6	207.6	375
	61.5	207.6	390
	63.3	207.7	405
	64.9	208	420
	66.9	208.3	435
	68.8	208.5	450
	70.9	208.6	465
	72.7	208.9	480
	74.3	209.1	495
	76.1	209.3	510
	77.9	209.6	525
	79.8	210	540
	81.6	210.1	555
	83.2	210.2	570
	85.3	210.5	585
	87.1	210.6	600
	88.9	211	615
	91	211.3	630
	93.2	211.4	645
	95.5	211.8	660
	97.6	212	675
	99.5	212.4	690
	101.8	212.6	705
	104	213	720
	106.1	213.1	736
	108.2	213.5	751
	110.3	213.6	766
	112.2	213.9	781
	114.3	214.2	796
	116.1	214.6	811
	118.2	214.6	826
	120.4	215	841
	122.5	215.2	856
	124.6	215.7	871
	126.7	215.8	886
	128.6	215.9	901
	130.7	216.2	916
	132.6	216.3	931
	134.7	216.7	946
	136.9	217	961
	139.3	217	976
	141.4	217.5	991
	143.5	217.8	1007
	145.7	217.9	1022
	147.8	218.1	1037
	150.2	218.4	1052
	152.6	218.9	1067
	154.8	219.4	1082
	157.2	219.4	1097
	159.6	219.5	1112
	162	219.9	1127
	164.7	220.3	1142
	167.4	220.7	1157
	170.4	221	1173
	173.3	221.3	1188
	176	221.6	1203
	178.7	222.1	1218
	181.4	222.5	1233
	184.2	223	1249
	186.9	223.4	1264
	189.3	223.6	1279
	192	224.2	1294
	194.5	224.6	1309
	196.9	225	1325
	199.6	225.6	1340
	202.1	225.7	1355
	204.2	226.2	1370
	206.7	226.7	1385
	209.2	227.1	1400
	211.6	227.6	1416
	214.1	227.9	1431
	216.5	228.3	1446
	219	228.8	1461
	221.2	229.1	1476
	223.6	229.5	1492
	226.4	229.9	1507
	229.1	230.2	1522
	231.9	230.7	1537
	234.6	231.1	1552
	237.7	231.5	1567
	240.4	231.9	1583
	243.4	232	1600
	246.2	232.8	1616
	248.7	233.3	1631
	251.2	233.6	1646
	253.9	233.1	1663
	257	233.1	1681
	259.5	234.8	1696
	262.5	234.7	1713
	265.6	235.7	1730
	268.4	235.5	1746
	271.2	235.7	1763
	273.9	236.9	1780
	277	236.2	1797
	279.8	237.3	1814
	282.9	237.9	1831
	285.7	238.3	1847
	288.7	237.9	1864
	291.5	238.8	1881
	294.3	238.5	1898
	297.1	238.6	1914
	299.9	239.5	1931
	302.8	239	1948
	305.6	239.9	1965
	308.4	239.3	1982
	311.5	238.9	1998
	314.6	239.1	2015
	317.4	239.3	2032
	320.2	238.7	2049
	323.4	239.1	2065
	326.2	239.1	2082
	329	237.9	2099
	331.9	236.4	2116
	334.7	236.1	2132
	337.8	236	2149
	340.7	234.9	2166
	343.8	234.3	2183
	346.7	232.4	2200
	349.5	232.5	2215
	352.4	231.4	2230
	355.2	230.1	2245
	357.8	229	2260
	360.4	227.7	2276
	363.2	226.3	2291
	365.8	224.9	2306
	368.4	223.4	2321
	371	222	2337
	373.9	220.5	2352
	376.8	219.2	2367
	379.6	217.9	2383
	382.2	216.4	2398
	384.8	215.3	2413
	387.7	214	2428
	390.6	212.9	2444
	393.2	211.6	2459
	396.1	210.6	2474
	398.7	209.4	2489
	401.6	207.9	2505
	404.3	207	2520
	406.9	205.9	2535
	409.8	205	2551
	412.7	203.7	2566
	415.3	203	2581
	418.5	201.9	2596
	421.2	201.4	2612
	424.1	200.3	2627
	426.4	199.4	2642
	429.1	198.4	2658
	431.4	197.9	2673
	434.1	197	2688
	436.7	196.3	2704
	439.4	195.4	2719
	442	194.6	2734
	444.4	193.8	2750
	447	193	2765
	449.7	192.5	2780
	452.6	191.7	2796
	455.3	190.7	2811
	458	190	2826
	460.6	189	2842
	463.3	188.6	2857
	465.7	187.7	2872
	468.3	186.8	2888
	471	186	2903
	473.7	185.3	2918
	476.4	184.2	2934
	479.4	183.7	2949
	482	182.6	2965
	484.4	181.7	2980
	487.1	181.2	2995
	490.1	180.2	3011
	493.4	179.2	3026
	496.1	178.4	3041
	498.5	177.6	3057
	501.2	176.8	3072
	503.6	175.9	3087
	506.6	174.9	3103
	509.3	173.8	3118
	512.1	173.1	3133
	514.5	172.1	3149
	517.2	170.8	3164
	519.9	169.9	3179
	522.6	169.2	3195
	525.4	168.4	3210
	528.1	167.4	3226
	531.1	166.4	3241
	534.2	165.5	3256
	536.9	164.6	3272
	540	163.6	3287
	542.7	162.6	3303
	545.1	161.8	3318
	547.6	160.4	3333
	549.7	159.8	3349
	552.2	158.9	3364
	554.6	157.7	3379
	557.4	156.8	3395
	560.5	156	3410
	562.9	154.6	3426
	565.4	152.7	3441
	568.1	146	3457
	571.5	131.3	3472
	574.3	110.7	3487
	577.4	90.7	3503
	580.8	73.1	3518
	583.9	58.5	3533
	587.3	45.5	3549
	590.7	31.2	3564
	594.1	17.4	3580
	597.5	4.7	3595
	600.6	-6.7	3610
	603.8	-16.7	3626
	606.6	-23.6	3641
	609.4	-28.5	3656
	611.9	-32.9	3672
	614.7	-36.9	3687
	617.5	-40.3	3703
	620.6	-43.2	3718
	623.8	-45.9	3734
	626	-47.7	3749
	628.8	-49.7	3764
	631.3	-51.4	3780
	634.2	-52.9	3795
	637.3	-54.7	3810
	640.5	-56.5	3826
	643.3	-58.3	3841
	646.5	-60.6	3857
	649.7	-61.8	3872
	652.8	-63.3	3888
	656.3	-65.3	3903
	659.8	-66.7	3919
	663	-68.6	3934
	665.9	-69.6	3949
	669.1	-70.8	3965
	672.3	-72.4	3980
	675.1	-73.5	3996
	678.3	-74.5	4011
	681.9	-75.9	4027
	685.4	-77.2	4042
	688.6	-78.3	4057
	691.8	-79.2	4073
	695.1	-80	4088
	698.3	-80.9	4104
	701.2	-82	4119
	703.5	-82.8	4135
	705.1	-83.3	4150
	705.7	-83.7	4165
	705.4	-83.8	4181
	704.4	-83.6	4196
	702.8	-83.2	4212
	701.2	-83.1	4227
	699.6	-82.1	4243
	698.3	-82.2	4258
	696.7	-81.8	4274
	694.7	-81.5	4289
	692.8	-81	4305
	690.9	-80.7	4320
	688.9	-80.4	4336
	686.7	-79.5	4351
	684.4	-79.4	4367
	681.6	-78.7	4382
	679	-78.1	4398
	676.4	-77.6	4413
	674.2	-76.9	4428
	671.9	-76	4444
	669.7	-75.6	4459
	667.5	-74.7	4475
	665.2	-74.2	4490
	663	-73.8	4506
	660.8	-72.8	4521
	658.6	-71.8	4536
	656	-70.9	4552
	653.5	-70	4567
	650.9	-69	4583
	649	-68.2	4598
	646.8	-67.2	4614
	645.2	-66.5	4629
	643.3	-65.7	4644
	641.4	-64.8	4660
	639.2	-64.4	4675
	636.7	-63.5	4691
	634.5	-62.4	4706
	632	-61.6	4722
	629.8	-60.1	4737
	627.6	-59.3	4753
	625.4	-57.8	4768
	622.8	-57	4783
	620.3	-55.1	4799
	617.8	-53.3	4814
	615.6	-50.6	4830
	612.8	-47.2	4845
	610.3	-44.2	4861
	607.8	-40.7	4876
	605.3	-36.5	4892
	602.8	-31.6	4907
	600.6	-26.6	4922
	598.5	-21.2	4938
	596.3	-15.7	4953
	593.8	-9.5	4968
	591.3	-3.1	4984
	588.8	3.1	4999
	586.4	9.6	5015
	583.9	16.1	5030
	581.4	22.8	5046
	578.9	30.8	5061
	576.8	38.7	5076
	574.6	48.5	5092
	572.4	59.8	5107
	570	69.6	5123
	567.8	76.4	5138
	565.7	79.7	5153
	563.2	80.8	5169
	560.5	81.5	5184
	558.3	81.5	5200
	555.8	81.7	5215
	553.4	81.6	5230
	550.6	81.4	5246
	548.2	81.1	5261
	545.8	81	5276
	543	80.9	5292
	540	80.8	5307
	537.2	80.4	5323
	534.5	80.7	5338
	532	80.3	5353
	529.3	80.1	5369
	526.9	79.9	5384
	524.2	79.9	5400
	521.7	79.4	5415
	519.3	79.7	5430
	516.9	79.6	5446
	514.5	79.4	5461
	512.1	79.5	5476
	509	79.2	5492
	505.7	79.1	5507
	502.7	78.9	5523
	499.4	78.5	5538
	496.1	78.6	5553
	493.1	78.6	5569
	489.8	78.4	5584
	486.8	78.3	5599
	483.8	77.9	5615
	481.1	77.9	5630
	478.8	77.5	5646
	476.4	77.8	5661
	474	77.7	5677
	471.6	77.9	5692
	469.2	77.7	5707
	467.1	77.5	5723
	464.8	77.4	5738
	462.7	77.2	5754
	460.3	77.3	5769
	458	77.3	5784
	455.6	77	5800
	453.5	76.7	5815
	451.1	76.8	5830
	449.1	76.8	5846
	446.7	76.7	5861
	444.7	76.4	5876
	442.9	76.3	5892
	441.4	76.4	5907
	439.9	76.3	5923
	438.8	76.3	5938
	437.9	76.3	5953
	437	76.2	5969
	435.5	76.1	5984
	434.1	76.3	5999
	432.3	76.1	6015
	430.8	75.9	6030
	429.1	75.8	6045
	427.6	76	6060
	426.1	76	6076
	424.7	75.7	6091
	422.9	75.5	6106
	421.2	75.6	6122
	419.4	75.7	6137
	418	75.5	6152
	415.9	75.5	6168
	414.2	75.2	6183
	412.1	75.2	6198
	410.1	75.1	6214
	408.3	75.4	6229
	406.6	74.9	6244
	404.8	75	6260
	402.8	75.2	6275
	401.1	74.7	6290
	399	74.8	6306
	397.3	74.7	6321
	395.5	74.6	6336
	394.1	74.6	6351
	392.6	74.6	6366
	390.9	74.6	6382
	389.2	74.6	6397
	387.4	74.6	6412
	385.7	74.4	6428
	384	74.5	6443
	382.2	74.1	6458
	380.8	74.1	6474
	379.1	73.9	6489
	377.9	74.1	6504
	376.8	74	6520
	375.9	74.1	6535
	374.7	74.2	6550
	373.3	74.1	6566
	371.3	73.9	6581
	369.3	73.8	6596
	367.3	73.8	6612
	365	73.8	6627
	363	73.6	6642
	360.9	73.9	6657
	359.2	73.7	6673
	357.2	73.7	6688
	355.2	73.6	6703
	353.5	73.9	6718
	352.1	73.5	6734
	350.4	73.4	6749
	348.9	73.6	6764
	347.5	73.5	6779
	345.8	73.4	6795
	344.1	73.3	6810
	342.4	73.5	6825
	340.4	73.1	6840
	338.4	73.1	6856
	336.1	73	6871
	333.8	72.8	6886
	331.6	73	6902
	329	72.9	6917
	326.8	72.7	6932
	324.5	72.7	6947
	322.2	72.7	6962
	319.7	72.5	6978
	317.4	72.5	6993
	314.9	72.3	7008
	312.1	72.2	7024
	309.5	72.4	7039
	306.7	72.2	7054
	304.2	72.2	7070
	301.6	72.2	7085
	298.8	71.8	7100
	296.3	71.8	7115
	293.5	71.8	7130
	291	71.6	7146
	288.2	71.4	7161
	285.4	71.2	7176
	282.9	71.2	7192
	280.1	71.2	7207
	277.3	71.1	7222
	274.2	70.9	7237
	271.4	71.1	7253
	268.6	70.8	7268
	265.6	70.6	7283
	262.5	70.6	7298
	259.8	70.4	7314
	257.3	70.3	7329
	254.8	70	7344
	252.3	70.1	7359
	249.5	70	7374
	247	69.8	7390
	244.8	69.7	7405
	242.3	69.6	7420
	239.6	69.5	7435
	237.1	69.4	7451
	234.6	69.2	7466
	232.2	69.1	7481
	229.7	69.1	7496
	226.9	68.9	7512
	224.5	68.7	7527
	222	68.6	7542
	219.5	68.5	7557
	216.8	68.2	7572
	214.1	68.3	7588
	211.9	68.2	7603
	209.4	67.9	7618
	207	67.9	7633
	204.5	67.7	7648
	202.3	67.7	7664
	200.2	67.5	7679
	198	67.4	7694
	195.8	67.3	7709
	193.6	67.2	7724
	191.2	67.1	7739
	188.8	67.1	7754
	186.3	67	7770
	183.6	67	7785
	180.9	66.7	7800
	178.2	66.7	7815
	175.5	66.6	7830
	173.1	66.4	7845
	170.4	66.5	7861
	167.7	66.1	7876
	165	66.4	7891
	162.3	66.3	7906
	159.6	66.1	7921
	157.2	66	7936
	154.8	66	7951
	152.4	66	7967
	150.2	66.1	7982
	148.1	65.9	7997
	145.9	66	8012
	143.8	66	8027
	141.7	65.9	8042
	139.3	66.2	8057
	136.9	66	8072
	134.7	66.3	8088
	132.6	66.1	8103
	130.2	66.1	8118
	127.8	66.4	8133
	125.7	66.2	8148
	123.6	66.3	8163
	121.4	66.5	8179
	119.3	66.3	8194
	117.5	66.3	8209
	115.6	66.6	8224
	113.7	66.8	8239
	111.9	66.5	8254
	110	66.7	8269
	107.9	66.7	8284
	106.1	66.8	8299
	104	66.8	8314
	102.1	66.8	8329
	100	66.7	8345

## Sheet: AL054
Thermomagnetic results
Sample	TEMP	TSUSC	TIME
AL054	(°C)	(°C)	(s)
	21.8	-74	0
	22.1	-73.4	17
	23.6	-73.9	32
	25.9	-73.8	47
	28.3	-73.9	62
	30.6	-73.9	77
	32.9	-74	92
	35	-73.9	107
	37.1	-74	122
	39.1	-74.1	137
	41.2	-74.1	152
	43	-74.1	167
	44.8	-74.1	182
	46.6	-74.1	197
	48.2	-74	212
	50	-73.9	227
	51.8	-74	242
	53.4	-73.9	257
	55.2	-74	273
	56.8	-74	288
	58.3	-74.2	303
	59.9	-74.1	318
	61.7	-74.1	333
	63.3	-73.9	348
	64.9	-74.1	363
	66.4	-74.3	378
	68.2	-74	393
	69.8	-74.1	408
	71.4	-74.1	423
	73.2	-74.1	438
	75	-74.1	454
	76.9	-74	469
	78.7	-74	484
	80.3	-74	499
	82.1	-74	514
	83.7	-73.9	529
	85.5	-74	544
	87.4	-74.1	559
	89.2	-74	574
	91	-74.1	589
	92.6	-74.1	604
	94.2	-74	620
	96.3	-74.1	635
	98.2	-74	650
	100	-74	665
	101.6	-74	680
	103.2	-73.9	695
	105	-74.1	710
	107.1	-73.8	725
	109	-73.9	741
	110.8	-73.9	756
	112.9	-73.9	771
	115.3	-73.7	786
	117.5	-74	801
	119.6	-73.7	816
	122	-73.8	831
	124.1	-73.7	846
	126.2	-73.8	862
	128.3	-73.7	877
	130.5	-73.7	892
	132.6	-73.7	907
	134.7	-73.6	922
	137.1	-73.5	937
	139.3	-73.6	952
	141.7	-73.4	968
	144.1	-73.5	983
	146.2	-73.5	998
	148.6	-73.4	1013
	151	-73.4	1029
	153.4	-73.5	1044
	155.9	-73.4	1059
	158.3	-73.2	1074
	160.7	-73.3	1089
	163.1	-73.3	1104
	165.3	-73.4	1120
	167.7	-73.2	1135
	169.8	-73.3	1150
	172.3	-73.2	1165
	174.7	-73.1	1180
	177.1	-73.2	1195
	179.6	-73.2	1210
	181.7	-73.3	1226
	183.9	-72.9	1241
	186	-73	1256
	187.9	-72.9	1271
	190.1	-73	1286
	192.6	-73	1302
	195	-72.9	1317
	197.4	-72.9	1332
	200.2	-72.9	1347
	202.6	-72.9	1362
	204.8	-72.8	1378
	207.2	-72.7	1393
	209.7	-72.7	1408
	212.2	-72.6	1423
	214.6	-72.6	1438
	217.1	-72.9	1454
	219.5	-72.6	1469
	222	-72.5	1484
	224.2	-72.4	1499
	226.4	-72.4	1515
	229.1	-72.4	1530
	231.9	-72.4	1545
	234.9	-72.4	1560
	237.7	-72.2	1575
	240.7	-72.2	1591
	243.4	-72	1606
	245.9	-72	1621
	248.4	-71.9	1636
	250.9	-72	1652
	253.7	-71.9	1667
	256.2	-72	1682
	258.7	-71.7	1697
	261.1	-71.7	1713
	263.6	-71.7	1728
	266.1	-71.6	1743
	268.4	-71.7	1758
	271.2	-71.7	1774
	273.4	-71.6	1789
	276.2	-71.5	1804
	278.7	-71.8	1819
	281.5	-71.5	1834
	284	-71.6	1850
	286.8	-71.3	1865
	289.3	-71.3	1880
	292.1	-71.3	1895
	294.9	-71.1	1911
	297.4	-71.3	1926
	299.9	-71.1	1941
	302.8	-71.1	1956
	305.3	-71.1	1972
	307.8	-71.2	1987
	310.6	-71	2002
	313.5	-71.1	2017
	316	-71.1	2033
	318.5	-70.7	2048
	321.1	-70.9	2063
	323.6	-71.1	2078
	326.5	-70.9	2094
	329	-70.8	2109
	331.6	-70.7	2124
	333.8	-71.1	2140
	335.8	-70.6	2155
	337.5	-70.8	2170
	339.2	-70.9	2186
	340.7	-71	2201
	342.4	-70.7	2216
	343.8	-70.9	2231
	345.8	-70.7	2247
	347.5	-70.7	2262
	349.5	-70.9	2277
	351.2	-70.7	2293
	352.9	-71	2308
	354.9	-70.8	2323
	357.2	-70.8	2339
	359.5	-70.9	2354
	361.8	-70.8	2369
	364.4	-70.8	2384
	367	-71	2400
	369.6	-70.8	2415
	372.1	-71	2430
	374.7	-70.9	2446
	377	-71	2461
	379.6	-71.2	2476
	381.9	-70.9	2492
	384.5	-71	2507
	387.1	-71.1	2522
	389.7	-70.9	2538
	392.4	-70.8	2553
	395	-70.9	2568
	397.6	-71.1	2584
	400.2	-71	2599
	402.8	-71.1	2614
	405.4	-71.3	2630
	408.3	-71.1	2645
	410.9	-71.1	2660
	413.3	-71.3	2676
	415.9	-71.1	2691
	418.2	-71	2706
	420.3	-71.2	2722
	422.6	-71.3	2737
	424.7	-71.3	2752
	427.3	-71.2	2768
	429.7	-71.4	2783
	432	-71.1	2798
	434.6	-71.2	2814
	437.3	-71.5	2829
	439.9	-71.3	2844
	442.6	-71.4	2859
	445.5	-71.5	2875
	448.2	-71.3	2890
	450.9	-71.3	2906
	453.5	-71.3	2921
	456.2	-71.5	2936
	458.8	-71.4	2952
	461.5	-71.2	2967
	464.2	-71.4	2982
	466.9	-71.2	2998
	469.2	-71.3	3013
	471.6	-70.9	3028
	473.7	-71.3	3044
	476.1	-70.9	3059
	478.8	-71.2	3074
	481.7	-71.1	3090
	485	-71	3105
	488	-70.9	3120
	490.7	-70.7	3136
	493.4	-71	3151
	496.4	-70.8	3166
	498.8	-70.5	3182
	501.2	-70.2	3197
	503.6	-70.6	3212
	506	-70.3	3228
	508.4	-70.5	3243
	510.9	-70.4	3258
	513.6	-70.2	3274
	516.3	-70.1	3289
	518.7	-70.4	3305
	521.4	-70.1	3320
	524.2	-69.9	3335
	526.9	-69.8	3351
	529.6	-69.8	3366
	532.7	-69.7	3382
	535.7	-69.4	3397
	538.4	-69.2	3413
	541.5	-68.5	3428
	544.2	-68.3	3443
	547	-67.8	3459
	549.7	-66.8	3474
	552.5	-66	3489
	554.9	-64.6	3505
	557.7	-62.9	3520
	560.5	-60.5	3536
	563.5	-58.5	3551
	566.6	-57.2	3567
	569.4	-58.5	3582
	572.1	-62.3	3598
	574.6	-67.8	3613
	577.4	-73.8	3628
	580.2	-78.7	3644
	582.9	-82.7	3659
	585.7	-86.7	3674
	588.5	-90.8	3690
	591.3	-94.3	3705
	594.1	-97.7	3720
	596.9	-101.2	3736
	599.4	-104.1	3751
	602.2	-106.8	3767
	605.6	-109.8	3782
	608.8	-112	3798
	611.6	-113	3813
	614.1	-113.8	3828
	616.9	-114.7	3844
	620	-115.8	3859
	623.2	-116.4	3875
	626.6	-117.2	3890
	630.1	-117.7	3906
	633.9	-118.2	3921
	637.3	-118.3	3937
	640.8	-119.1	3952
	643.6	-119.4	3967
	646.8	-119.7	3983
	650	-120.2	3998
	653.2	-120.1	4014
	656.3	-120.3	4029
	659.5	-121	4044
	662.4	-121.2	4060
	665.2	-121.5	4075
	668.4	-121.7	4091
	671.6	-121.5	4106
	674.5	-122.1	4122
	677.7	-122.5	4137
	680.9	-122.3	4152
	684.1	-122.6	4168
	687.3	-122.6	4183
	690.5	-122.9	4199
	693.8	-122.9	4214
	696.7	-123.2	4229
	700.2	-123.4	4245
	703.8	-123.4	4260
	706	-123.8	4276
	707.3	-123.8	4291
	707.7	-124.1	4307
	708	-123.7	4322
	707.3	-123.7	4338
	705.7	-123.8	4353
	704.1	-123.2	4368
	702.5	-123	4384
	700.5	-122.9	4399
	698.6	-122.4	4415
	696.4	-121.6	4430
	694.4	-121.2	4446
	692.5	-120.6	4461
	690.2	-120.5	4476
	688.3	-120	4492
	686	-118.6	4507
	683.5	-118.3	4523
	681.6	-117.8	4538
	679.6	-117.2	4554
	677.1	-116.8	4569
	674.5	-115.4	4585
	671.9	-114.9	4600
	669.7	-114.6	4615
	667.2	-113.7	4631
	664.6	-113	4646
	662.1	-112.1	4662
	659.8	-110.9	4677
	657	-109.9	4693
	654.1	-109	4708
	651.2	-107.9	4723
	648.4	-106.2	4739
	645.9	-105.1	4755
	643.3	-103.8	4770
	640.5	-102.2	4785
	638	-100.5	4801
	635.4	-99.1	4816
	633.2	-97.8	4832
	631	-95.8	4847
	628.8	-94	4863
	626.6	-92.5	4878
	624.7	-90.7	4894
	622.5	-88.2	4909
	620	-85.9	4925
	617.8	-83.5	4940
	615.3	-80.3	4956
	612.8	-76.5	4971
	610	-71.5	4987
	607.5	-66.2	5002
	605	-59.9	5017
	602.2	-51.8	5033
	599.4	-42.6	5048
	596.9	-32.9	5064
	593.8	-22.7	5079
	591.3	-12.4	5095
	588.8	-1.7	5110
	586	10.2	5125
	583.6	21.7	5141
	581.1	33.3	5156
	578.9	44.6	5172
	576.1	61.8	5190
	573.4	82.1	5205
	570.9	103.3	5220
	568.1	118.4	5236
	565.4	126.7	5251
	562.6	127.8	5267
	559.8	126.5	5282
	556.8	125.6	5298
	554	124.4	5313
	551.6	123.4	5328
	549.1	122.6	5344
	546.4	122.1	5359
	543.9	121.4	5375
	541.5	120.8	5390
	539	120.4	5405
	536.6	120.1	5421
	534.2	119.7	5436
	532	119.3	5451
	529.6	118.9	5467
	527.2	118.3	5482
	524.2	117.7	5498
	521.4	117.4	5513
	518.4	116.8	5529
	516	116.4	5544
	513.9	115.7	5559
	511.8	115.6	5575
	509.9	115	5590
	507.8	114.4	5606
	505.7	114	5621
	503.6	113.1	5637
	501.2	112.7	5652
	499.4	111.6	5667
	497.3	111.2	5683
	495.2	110.4	5698
	493.1	109.8	5713
	491.3	109.3	5729
	489.2	108.2	5744
	486.8	107.3	5760
	484.4	106.6	5775
	482.6	105.9	5790
	480.5	104.9	5806
	478.8	104.2	5821
	476.4	103.5	5837
	474	102.6	5852
	471.6	101.8	5867
	469.8	100.8	5883
	468	100.1	5898
	466.6	99.3	5914
	464.8	98.8	5929
	463	98.1	5944
	461.2	97.4	5959
	459.4	97	5975
	457.7	96.5	5990
	456.2	95.9	6006
	455	95.5	6021
	453.8	95.3	6036
	452.6	94.6	6052
	451.1	94.2	6067
	450	94	6082
	448.5	93.3	6098
	447	92.8	6113
	445.5	92.4	6129
	444.4	92.1	6144
	443.2	91.7	6159
	441.7	91.3	6175
	440.2	90.9	6190
	438.5	90.2	6205
	436.7	89.8	6221
	435.2	89.8	6236
	433.8	89.1	6251
	432.3	88.8	6267
	430.5	88.3	6282
	428.8	88.1	6297
	427	87.6	6313
	425	87.3	6328
	423.2	87.1	6343
	421.8	86.7	6359
	420.6	86.3	6374
	419.4	85.5	6390
	418	85.1	6405
	416.8	84.5	6420
	415.3	83.9	6436
	414.2	83.4	6451
	412.7	82.8	6466
	410.9	82.3	6482
	409.2	81.8	6497
	408	81.3	6512
	406.6	80.9	6528
	405.4	80.4	6543
	404	80	6558
	402.5	79.6	6574
	400.8	79.1	6589
	399.3	78.8	6604
	398.2	78.3	6619
	397.3	78.2	6634
	396.1	78	6650
	395.3	77.8	6665
	394.1	77.5	6680
	392.9	77.3	6695
	391.8	76.8	6711
	390.3	76.4	6726
	388.9	76.1	6741
	387.7	75.8	6757
	386.3	75.6	6772
	385.4	75.2	6787
	384.3	74.8	6802
	383.1	74	6818
	382.2	72.7	6833
	381.1	71.1	6848
	379.9	69.4	6864
	379.1	66.6	6879
	377.9	64	6894
	376.8	61.3	6910
	375.3	58.9	6925
	373.9	56.8	6940
	372.4	54.8	6955
	371.3	52.9	6971
	369.8	51.4	6986
	368.1	50	7001
	366.7	48.6	7016
	365.3	47.5	7032
	364.1	46.8	7047
	363.2	45.8	7062
	362.4	44.9	7078
	360.9	44.3	7093
	359.5	43.7	7108
	357.8	42.9	7124
	355.8	42.3	7139
	353.8	42	7154
	351.8	41.4	7169
	350.1	40.9	7185
	348.4	40.5	7200
	346.9	40.2	7215
	345.8	39.8	7230
	344.4	39.5	7246
	342.9	39.2	7261
	341.2	38.8	7276
	339.2	38.4	7292
	337.3	38.3	7307
	335	37.9	7322
	332.7	37.8	7337
	330.4	37.3	7353
	328.2	37	7368
	325.9	36.9	7383
	323.6	36.6	7399
	321.4	36.2	7414
	319.4	36	7429
	317.7	36.1	7444
	316	35.7	7459
	314.6	35.8	7475
	313.5	35.5	7490
	312.3	35.5	7505
	310.9	35.4	7521
	309.5	35.2	7536
	308.4	34.9	7551
	307	34.9	7566
	305.6	34.8	7582
	304.2	34.6	7597
	302.8	34.5	7612
	301.4	34.2	7627
	299.9	34.4	7642
	298.3	34.2	7658
	296.9	34	7673
	295.2	33.8	7688
	293.5	33.7	7703
	291.8	33.7	7718
	290.1	33.5	7733
	288.5	33.5	7749
	286.5	33.3	7764
	284.8	33.2	7779
	282.6	33.1	7794
	280.6	33	7810
	278.7	32.8	7825
	276.7	32.7	7840
	274.8	32.5	7855
	273.1	32.5	7871
	271.7	32.3	7886
	270	32.3	7901
	268.1	32	7916
	266.1	32.1	7932
	263.9	31.8	7947
	261.4	31.6	7962
	259.2	31.6	7977
	256.7	31.4	7992
	253.9	31.5	8007
	251.7	31.1	8023
	249.5	31	8038
	247.3	30.9	8053
	245.1	30.5	8068
	242.9	30.6	8083
	240.4	30.4	8098
	238.2	30.2	8113
	236	29.8	8129
	233.8	29.8	8144
	231.6	29.7	8159
	229.4	29.6	8174
	226.9	29.3	8190
	224.5	29.2	8205
	222	28.8	8220
	219.5	28.6	8235
	217.4	28.6	8250
	214.9	28.3	8266
	212.7	28.2	8281
	210.2	27.8	8296
	207.5	27.8	8311
	205.1	27.5	8326
	202.6	27.1	8341
	200.2	27	8356
	197.7	26.9	8372
	195.5	26.6	8387
	193.4	26.4	8402
	190.9	26.1	8417
	188.8	25.8	8432
	186.3	25.5	8448
	183.9	25.5	8463
	181.7	25.3	8478
	179.3	24.9	8493
	176.9	24.7	8508
	174.4	24.5	8523
	172	24.1	8538
	169.3	23.8	8554
	167.1	23.7	8569
	164.5	23.5	8584
	162	23.1	8599
	159.6	22.8	8614
	157.5	22.6	8629
	155.3	22.4	8644
	152.9	22.3	8659
	151	22	8674
	148.9	21.9	8689
	147	21.5	8704
	144.9	21.5	8720
	142.7	21.2	8735
	140.9	20.9	8750
	138.7	20.7	8765
	136.6	20.3	8780
	134.2	20.1	8795
	132.1	19.9	8810
	129.7	19.6	8825
	127.5	19.5	8840
	125.2	19.4	8855
	123	19.2	8870
	120.9	18.8	8885
	118.8	18.8	8900
	116.7	18.6	8916

## Sheet: AL062
Thermomagnetic results
Sample	TEMP	TSUSC	TIME
AL062	(°C)	(°C)	(s)
	21	305.3	0
	21.6	305	19
	23.4	306.1	35
	25.7	305.1	51
	28.3	306.1	68
	30.8	305	84
	33.4	305.5	101
	35.8	305.3	117
	37.8	306.7	134
	40.2	305.2	150
	42	305.5	167
	44	305.3	183
	46.1	305.3	200
	47.9	305.1	216
	49.8	305.5	233
	51.8	305.6	249
	53.4	305.4	266
	55.2	306.5	282
	57	307	298
	58.9	306.8	315
	60.9	306.6	332
	62.8	306	348
	64.6	306.6	364
	66.4	306.5	381
	68.5	307.3	397
	70.3	306.9	414
	72.4	306.6	430
	74.5	307.9	447
	76.4	307.9	464
	78.4	308.9	480
	80.3	308.6	497
	82.4	309	513
	84.2	309.1	530
	86.3	309.7	546
	88.4	308.3	563
	90.3	309.3	579
	92.4	310.1	596
	94.5	308.9	612
	96.6	309.8	629
	98.7	309.9	646
	100.8	310.3	662
	102.9	310.6	679
	105	310.8	695
	107.4	310.7	712
	109.8	311.1	729
	112.4	312.2	745
	114.8	311.1	762
	117.2	312.2	778
	119.6	312.9	795
	122	313.7	812
	124.1	313	828
	126.2	313	845
	128.6	313.8	861
	130.7	313.8	878
	133.1	314	895
	135.3	314	911
	137.7	314.3	928
	140.1	314.7	944
	142.5	315.3	961
	144.9	315.3	978
	147.3	315.3	994
	149.7	316.1	1011
	152.1	316.1	1027
	154.8	315.9	1044
	157.5	315.4	1061
	160.2	316.5	1078
	162.8	317.5	1094
	165.3	317.4	1111
	168	317.1	1127
	170.1	317.8	1144
	172.5	318.4	1161
	175	319.1	1177
	177.7	319.2	1194
	180.1	317.8	1211
	182.3	320.8	1228
	184.7	320.8	1244
	187.1	320.5	1261
	189.8	322	1278
	192.3	321.5	1294
	194.7	320.8	1311
	197.4	320.8	1327
	199.9	323	1344
	202.6	322.5	1361
	205.1	324.4	1378
	207.5	323.1	1394
	210	324.9	1411
	212.4	325.7	1428
	214.9	324.5	1444
	217.1	325.4	1461
	219.5	325.6	1478
	221.7	325.3	1494
	224.2	329	1511
	226.7	325.5	1528
	229.7	326.8	1545
	232.4	327.1	1561
	235.7	328.2	1578
	238.8	329.6	1595
	241.8	329.6	1612
	244.5	328.8	1628
	247.3	329.2	1645
	250.1	330.3	1662
	252.8	331	1678
	255.6	331.2	1695
	258.1	330.8	1712
	260.9	331.8	1728
	263.6	331.7	1745
	266.1	332.4	1762
	268.9	332.6	1779
	271.4	333	1795
	274.2	334.4	1812
	277	334	1829
	279.8	333.8	1846
	282.9	332.6	1862
	285.4	335.4	1879
	287.6	334.7	1896
	289.6	335.2	1913
	291.5	334.7	1929
	293.5	336.7	1946
	295.7	335.1	1963
	298	336.4	1980
	300.2	337.3	1997
	302.8	336.4	2013
	305.3	337.6	2030
	308.1	336.8	2047
	310.9	337.4	2064
	313.7	338.6	2080
	316.3	338.2	2097
	319.1	338.5	2114
	321.9	338.4	2131
	324.8	338.2	2148
	327.6	338.9	2164
	330.2	339.5	2181
	332.4	338.7	2198
	334.4	337.7	2214
	336.4	337.5	2231
	338.4	337.1	2248
	340.7	337	2265
	342.9	335.2	2282
	345.5	335.2	2298
	348.1	334.5	2315
	350.4	333.1	2332
	352.9	331.7	2349
	354.9	331.5	2366
	357.2	332	2383
	359.5	328.1	2399
	361.5	328.2	2416
	363.5	326	2433
	366.1	328.5	2450
	368.7	325	2466
	371.6	324.6	2483
	374.2	323.6	2500
	377	322.2	2517
	379.9	320.4	2534
	383.1	319.2	2550
	386	318.3	2567
	388.6	316.6	2584
	391.5	316	2601
	394.1	315.7	2618
	396.7	314	2634
	399.6	314.6	2651
	402.5	311.9	2668
	405.4	311.7	2685
	408.6	311.7	2702
	411.8	310.3	2718
	414.7	309.2	2735
	417.7	308.6	2752
	420.3	307.3	2769
	423.2	305.5	2786
	426.1	306.5	2802
	429.1	305	2819
	432	303.2	2836
	434.6	304.5	2853
	437.6	303.7	2870
	440.5	301.8	2886
	443.5	300.1	2903
	446.4	300.6	2920
	449.7	298.5	2937
	452.6	299.1	2954
	455.6	298.4	2970
	458.8	297.6	2987
	461.8	296.3	3004
	464.5	295.7	3021
	467.7	295.9	3038
	470.7	295.9	3055
	473.7	293.3	3071
	476.7	292.9	3088
	479.7	292.4	3105
	482.6	290.9	3122
	485.9	291.8	3139
	489.2	289	3155
	492.5	288.8	3172
	495.2	288	3189
	498.2	286.8	3206
	501.2	286.5	3223
	503.9	284.3	3240
	506.9	283.3	3257
	509.9	283	3273
	513.3	282.6	3290
	516.3	280.9	3307
	519.6	279.5	3324
	522.6	279.7	3341
	525.7	279.3	3358
	528.7	275.5	3374
	531.4	277	3391
	534.5	276.6	3408
	537.5	274.7	3425
	540.6	275.7	3442
	543.6	273.3	3459
	546.7	274.2	3476
	549.4	273.2	3492
	552.8	271.5	3509
	555.8	270.2	3526
	558.9	266.9	3543
	562	254.7	3560
	565.1	232.1	3577
	568.1	205.9	3592
	571.5	180.8	3608
	574.3	160.5	3623
	577.4	142.6	3638
	580.8	127.4	3654
	583.9	112.9	3669
	587	97.9	3684
	590.1	84.2	3700
	592.9	74.1	3715
	595.7	65.7	3730
	598.5	57.8	3746
	601.3	51.6	3761
	604.1	46	3776
	606.6	42.1	3792
	609.4	38	3807
	612.5	34	3822
	615.3	29.7	3838
	618.5	26.7	3853
	621.3	23.4	3868
	624.1	20.8	3884
	626.9	18.3	3899
	630.1	15.8	3914
	632.9	12.2	3930
	635.7	10.4	3945
	638.6	8.3	3961
	641.7	6.6	3976
	644.9	4.3	3991
	647.8	2	4006
	650.6	-0.3	4022
	653.8	-2.3	4037
	657	-5.1	4053
	660.1	-6.5	4068
	663.3	-8.5	4083
	666.5	-10.2	4099
	669.7	-11.9	4114
	672.9	-14.1	4130
	676.4	-16.4	4145
	679.6	-18	4160
	682.5	-20.3	4176
	685.4	-22.2	4191
	688.6	-23.7	4206
	691.8	-25.1	4222
	694.7	-26.4	4237
	698	-27.8	4252
	701.2	-29.3	4268
	704.8	-31.1	4283
	707	-32.5	4299
	708.3	-33.2	4314
	709	-33.5	4330
	709.3	-34.3	4345
	708	-34.1	4360
	706.4	-34.2	4376
	704.4	-33.9	4391
	702.8	-33.5	4406
	700.5	-32.6	4422
	698.3	-32.2	4437
	696	-31.5	4453
	693.8	-30	4468
	691.5	-29.8	4483
	689.6	-28.8	4499
	687.3	-27.8	4514
	684.8	-27.4	4530
	682.5	-26.4	4545
	680.6	-25.7	4560
	678.3	-23.7	4576
	675.8	-22.6	4591
	673.2	-21.3	4606
	671	-19.8	4622
	668.4	-18.6	4637
	666.2	-17.9	4653
	664	-16.6	4668
	661.7	-15.7	4684
	659.8	-14.6	4699
	657.6	-13.6	4714
	655.4	-12.3	4730
	653.2	-11.5	4745
	650.9	-10	4760
	648.7	-8.9	4776
	646.5	-7.1	4791
	644	-5.9	4807
	641.4	-4.2	4822
	638.9	-2.9	4837
	637	-1.7	4853
	634.8	-0.6	4868
	632.6	1.4	4884
	630.1	3.2	4899
	627.6	5	4914
	625.4	7.3	4930
	622.8	9.4	4945
	620.3	11.5	4960
	617.8	13.8	4976
	615.3	16.3	4991
	613.1	18.7	5007
	610.6	21.2	5022
	608.1	24.2	5037
	605.6	28.8	5053
	602.8	33.4	5068
	600.3	39.3	5084
	597.5	46.3	5099
	595	53	5114
	592.2	60.5	5130
	589.5	69.8	5145
	587	81.4	5161
	584.2	90.5	5176
	582	99.9	5191
	579.5	109.3	5207
	577.1	120	5222
	574.6	130.8	5237
	572.1	143	5252
	569.7	157.7	5268
	567.2	174.6	5283
	564.8	191.3	5298
	562.3	203.6	5314
	560.1	209.9	5329
	558	214.5	5344
	555.5	216.1	5360
	553.1	217.1	5375
	551	218	5390
	548.5	218.9	5406
	546.1	219.4	5421
	543.6	220.4	5437
	541.2	220.9	5452
	539	222.2	5467
	536.6	222.8	5482
	533.9	223.6	5498
	531.1	224.8	5513
	528.1	224.8	5530
	524.8	227.2	5547
	522.3	227.9	5562
	519.6	227	5579
	517.5	229.7	5596
	515.4	229.1	5613
	513	230.1	5629
	511.2	229.8	5646
	508.7	233.6	5663
	506	232.8	5680
	503.6	230.4	5697
	501.2	231.6	5714
	498.8	234.4	5730
	496.4	235.5	5747
	494	236.3	5764
	491.6	235.4	5781
	489.2	235.6	5798
	487.1	236.8	5815
	485.3	238	5831
	483.5	236.4	5848
	482	236.8	5865
	480.2	238.2	5882
	478.8	237.5	5899
	477.3	237.9	5915
	475.8	237.6	5932
	474.3	238.8	5949
	472.2	238.6	5966
	470.4	238.2	5982
	468.6	237.7	5999
	467.1	238.3	6016
	466	237.7	6033
	464.5	238.5	6050
	463.3	239.2	6066
	462.1	238.2	6083
	461.2	238.8	6100
	460.3	239.2	6117
	459.4	240	6134
	458.2	239.5	6151
	456.5	238.9	6168
	454.4	237.5	6184
	452.3	239.6	6201
	450	240.6	6218
	447.3	239.5	6235
	445	239	6252
	442.6	240.4	6269
	440.5	239.2	6285
	438.5	238.4	6302
	436.7	238.1	6319
	434.9	237.9	6336
	432.9	237.4	6353
	430.5	240.2	6369
	427.9	238.6	6386
	425.3	238.2	6403
	422.9	238.6	6420
	420.6	237.5	6437
	418.2	237.9	6454
	415.9	236.6	6470
	414.2	236.7	6487
	412.1	238.4	6504
	410.7	236.6	6521
	409.2	236.9	6537
	407.5	237.5	6554
	405.4	235.8	6571
	404	238.1	6588
	402.2	236.9	6604
	400.5	236.9	6621
	398.7	236.4	6638
	397	237.6	6655
	395	236.6	6672
	392.9	238.2	6688
	391.2	236.5	6705
	389.5	235.5	6722
	388	235.8	6739
	386.6	235.6	6756
	385.1	235.4	6773
	383.4	236.5	6790
	381.7	236.6	6806
	379.9	236.2	6823
	377.9	234.3	6840
	375.9	235.7	6856
	373.9	234	6873
	371.9	236.2	6890
	369.6	235	6907
	367.5	235.5	6923
	365.5	234.2	6940
	363.5	234.1	6957
	361.5	233.1	6974
	359.8	233.4	6991
	357.8	233.5	7007
	356.1	234	7024
	354.4	235.1	7041
	352.9	232.9	7058
	351.5	233.5	7074
	349.8	233.3	7091
	347.8	233.6	7108
	345.8	233.8	7124
	343.5	233.6	7141
	341.2	234.4	7158
	339.2	231.3	7175
	337.5	231.5	7191
	335.8	231.3	7208
	334.4	230.5	7225
	332.7	232.3	7242
	330.7	231.1	7259
	328.7	231	7275
	326.8	231	7292
	325.1	231.5	7309
	323.1	230.4	7325
	321.7	229.9	7342
	320	230.6	7359
	318.3	230.9	7376
	316.8	231	7392
	315.4	230.2	7409
	314	231.6	7426
	312.9	228.6	7443
	311.8	228.2	7460
	310.6	229.8	7476
	309	228.6	7493
	307.5	229.5	7510
	306.1	229.7	7527
	304.7	229.6	7543
	303.3	230.1	7560
	301.6	229.9	7577
	299.7	229.9	7593
	298	228.6	7610
	296.6	228.4	7627
	294.9	228.5	7644
	293.5	228.8	7661
	292.1	228.3	7677
	290.1	227.9	7694
	288.2	228.2	7711
	285.9	227.7	7727
	283.7	227.7	7744
	281.7	227.7	7759
	279.8	227.7	7775
	277.6	227.5	7790
	275.3	227.3	7805
	272.5	225.2	7823
	270	226.9	7839
	267.5	226.8	7854
	265	226.6	7869
	262.8	226.2	7884
	260.3	226.2	7900
	257.5	226	7915
	255.3	225.9	7930
	253.1	225.4	7945
	250.9	225.2	7960
	249	225.3	7975
	246.8	225.1	7993
	244.8	224.8	8008
	242.6	224	8025
	240.4	224.4	8042
	238.2	224.2	8058
	236	224.2	8073
	233.5	225.2	8090
	231.3	223.8	8105
	229.1	223.5	8120
	226.7	223.3	8135
	224.5	222.9	8150
	222	222.9	8166
	219.5	222.7	8181
	217.1	222.3	8196
	214.9	222.1	8211
	212.7	222	8226
	210.5	221.9	8241
	208.6	221.6	8257
	206.4	221.5	8272
	204.2	221.1	8287
	202.1	221	8302
	199.9	220.6	8317
	198	220.5	8332
	195.8	220.1	8347
	193.4	219.9	8362
	191.2	219.8	8377
	189	219.5	8392
	186.6	219.2	8407
	184.4	219.3	8422
	182.3	218.8	8438
	179.8	218.6	8453
	177.4	218.6	8468
	175	218.4	8483
	172.5	218.3	8498
	170.1	218.2	8513
	167.4	218	8528
	165	218	8543
	162.8	217.8	8558
	160.4	217.6	8573
	158.3	217.7	8588
	155.9	217.7	8604
	154	217.4	8618
	151.8	217.7	8634
	149.7	217.4	8649
	147.8	217.4	8664
	145.7	217.4	8679
	143.8	217.3	8694
	141.7	217.4	8709
	139.5	217.4	8724
	137.4	217.5	8739
	135.5	217.4	8754
	133.7	217.5	8769
	131.5	217.6	8784
	129.7	217.4	8799
	127.8	217.4	8814
	125.9	217.5	8829
	123.8	217.7	8844
	122	217.8	8859
	120.1	217.9	8874
	118	218	8889
	116.1	217.9	8904
	114.3	218.1	8919
	112.2	218.1	8934
	110.6	218.2	8949
	109	218.2	8964

[truncated: 6 more sheets: AL067, AL079, AL081, AL094, AL096, AL100]
